# Supplementary material
Source: PubMed Central journal article supplement (PMC5127601)

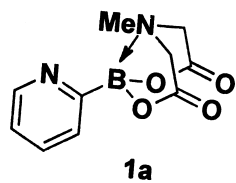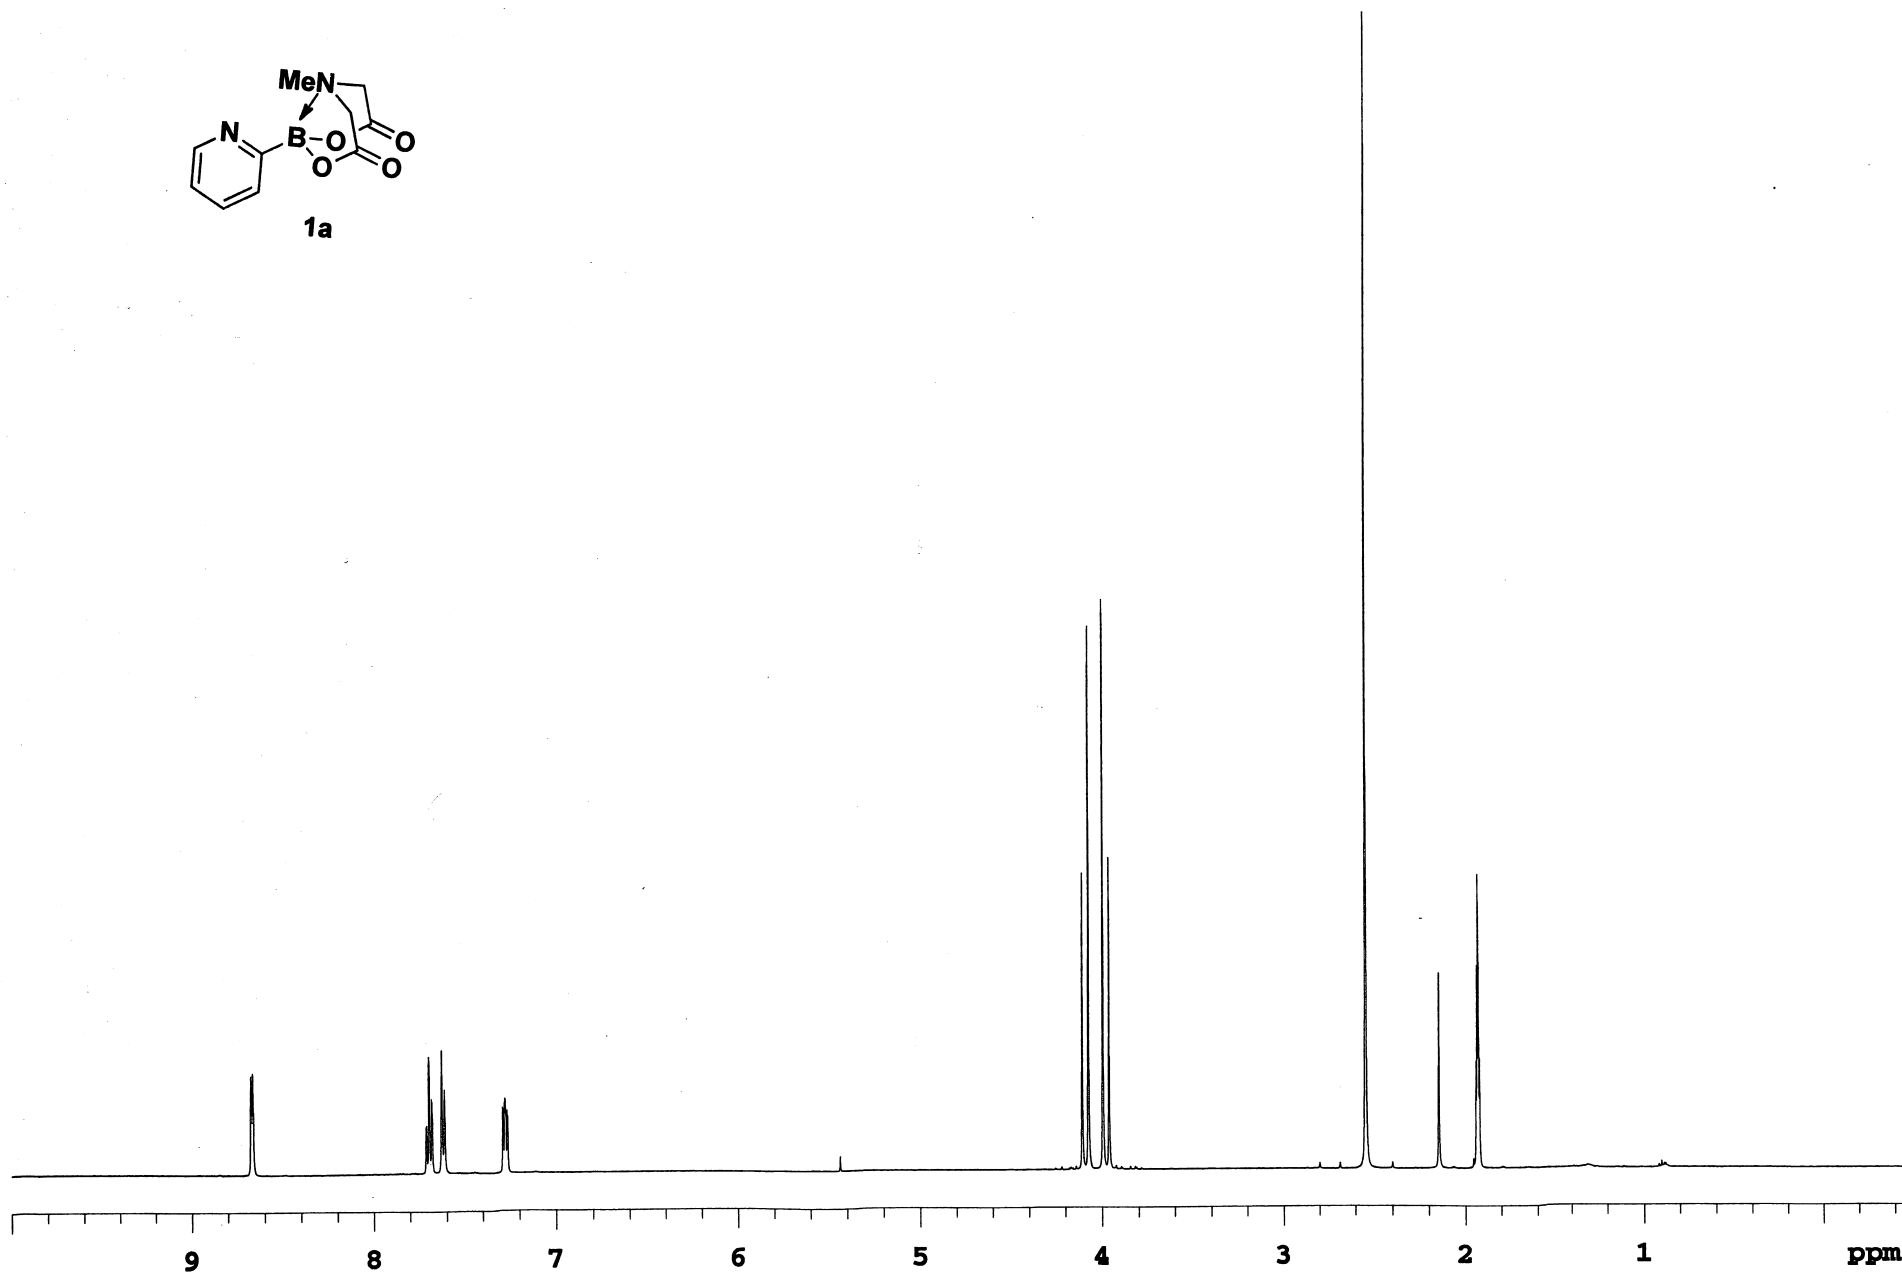

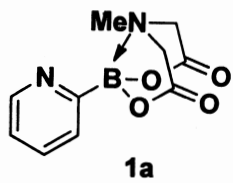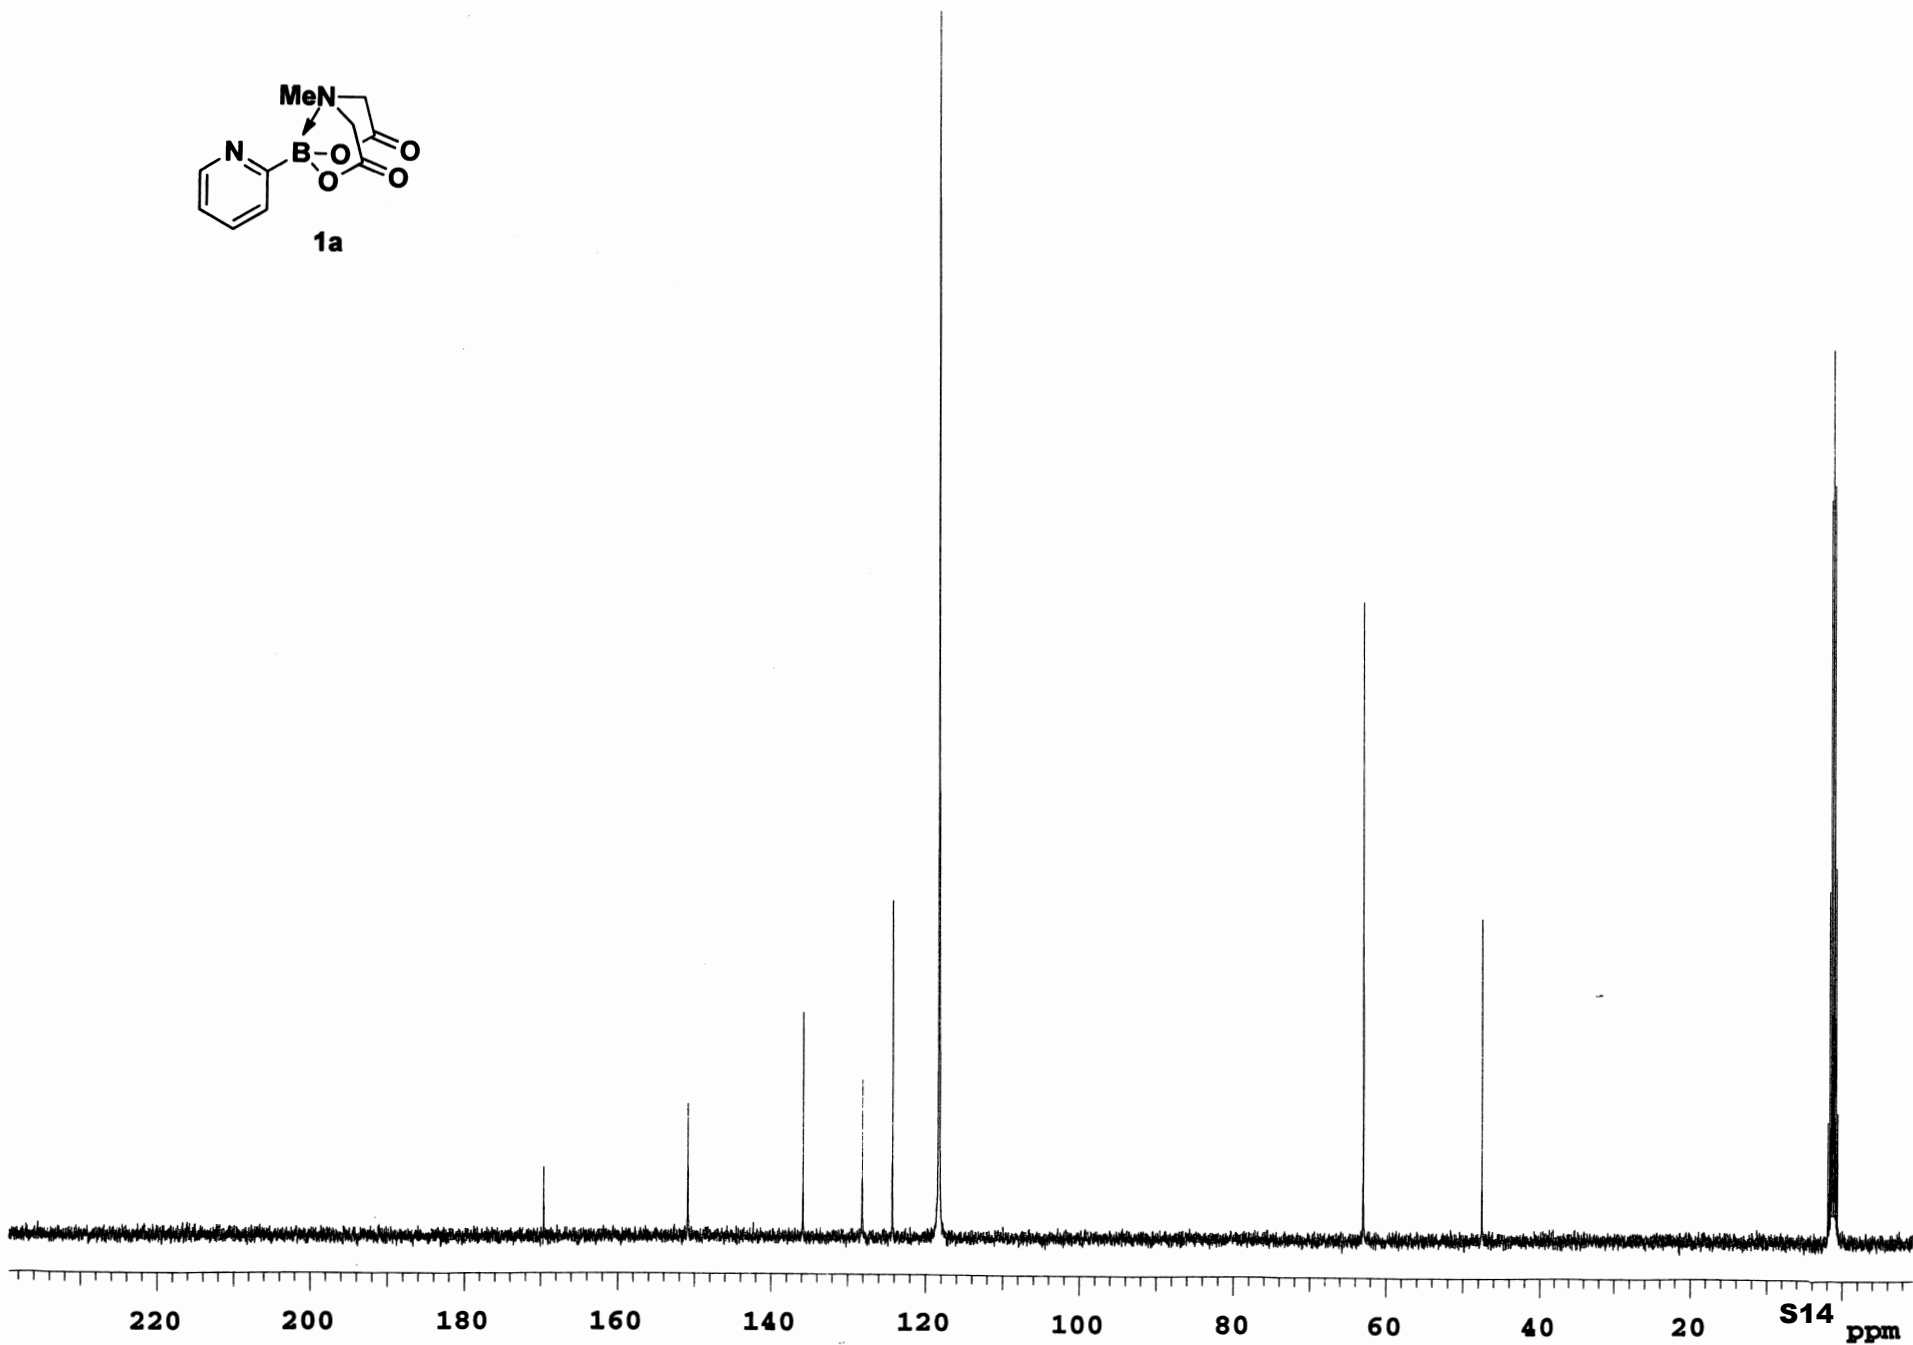

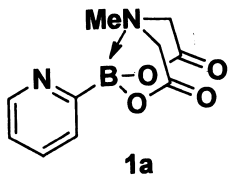

Before Heating at 130 °C

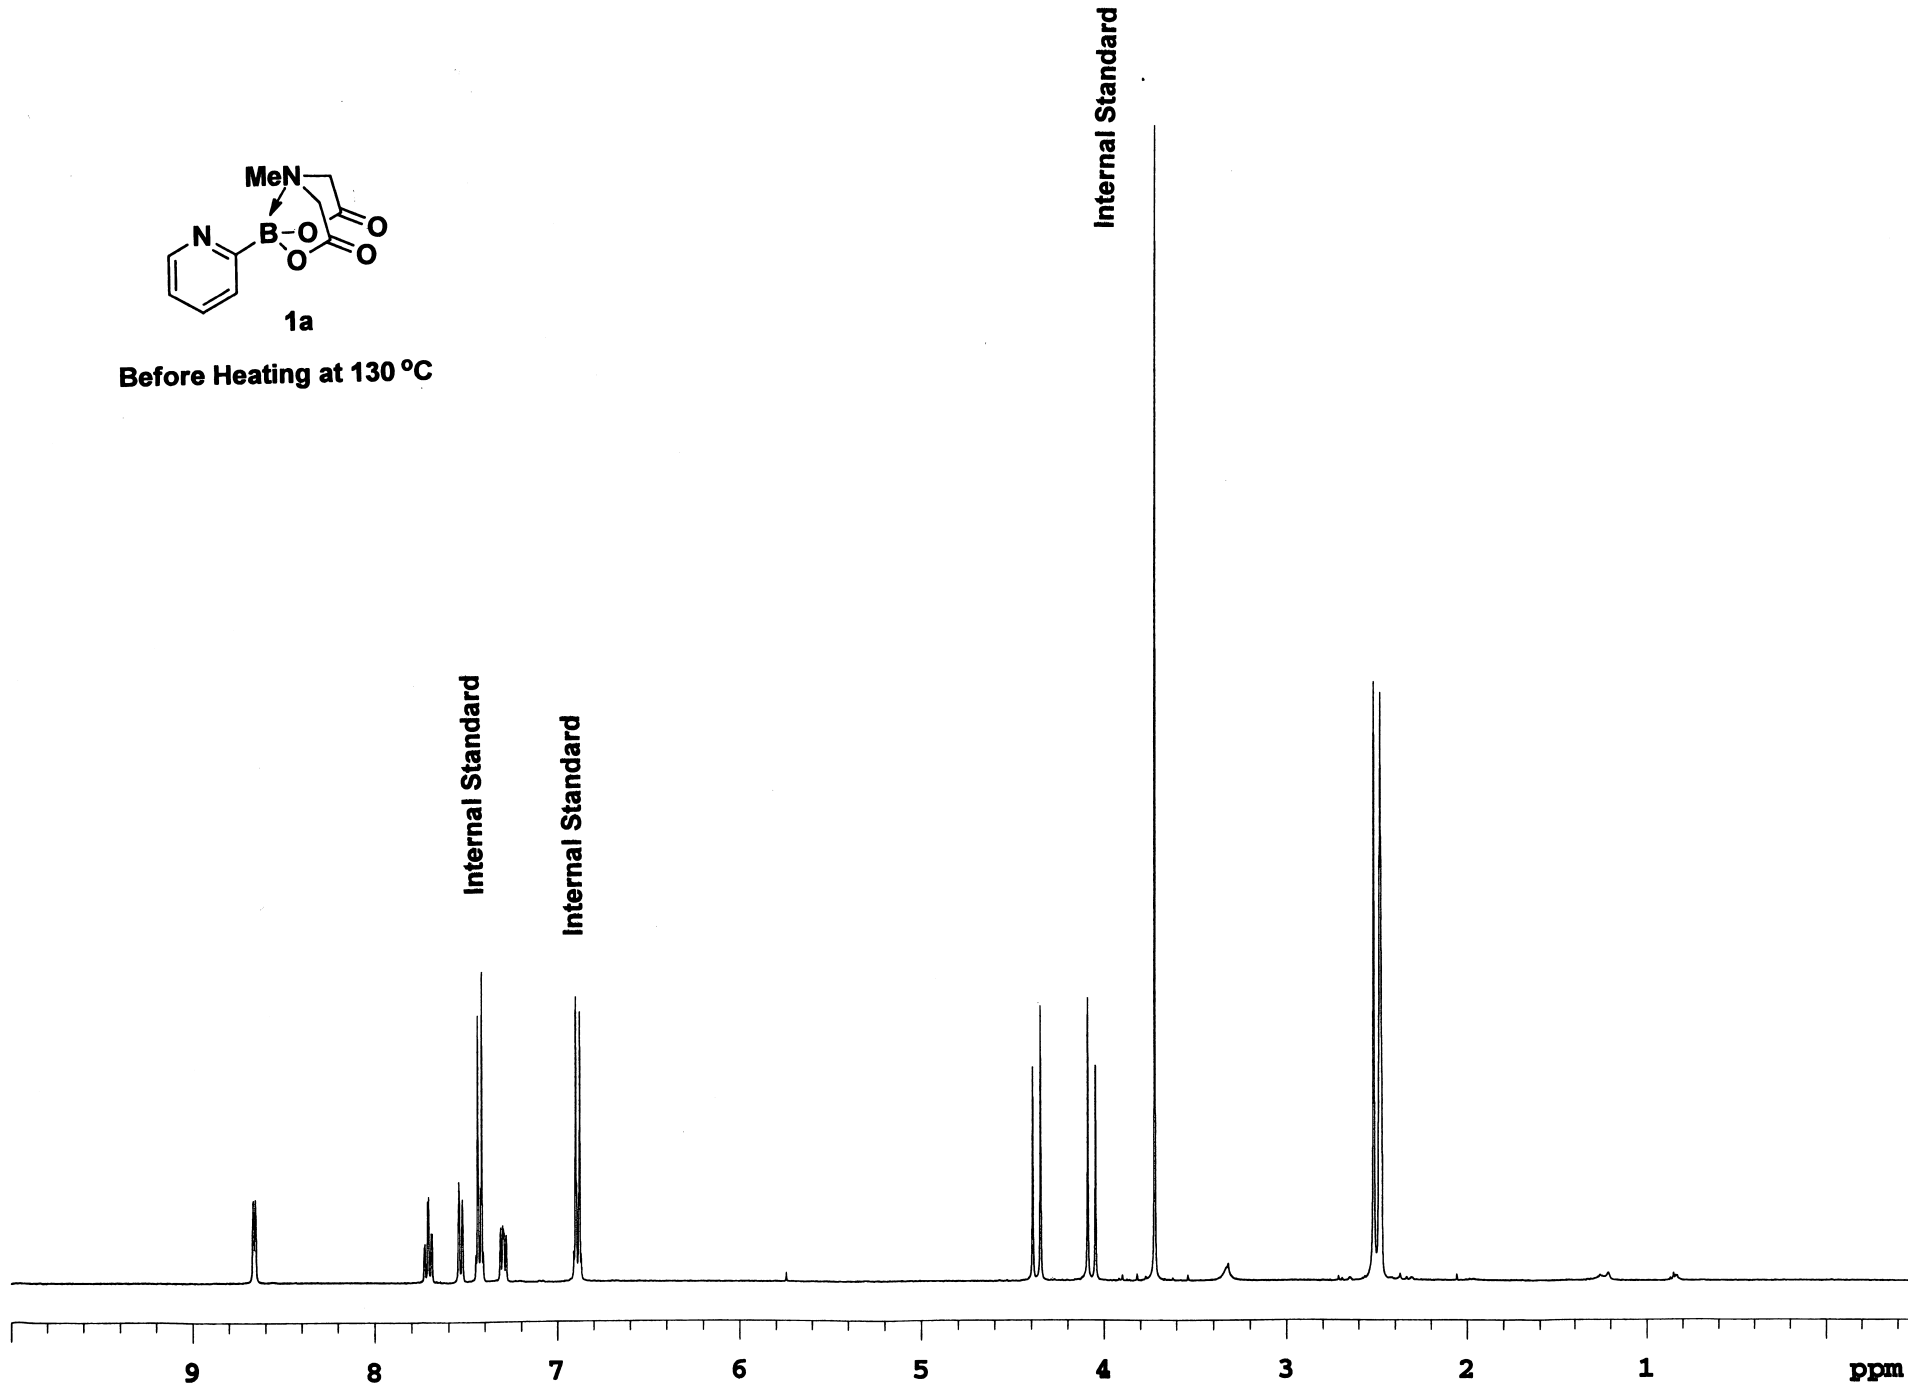

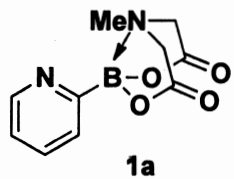

After Heating at 130 °C for  
1h as a Solution in DMSO-d<sub>6</sub>

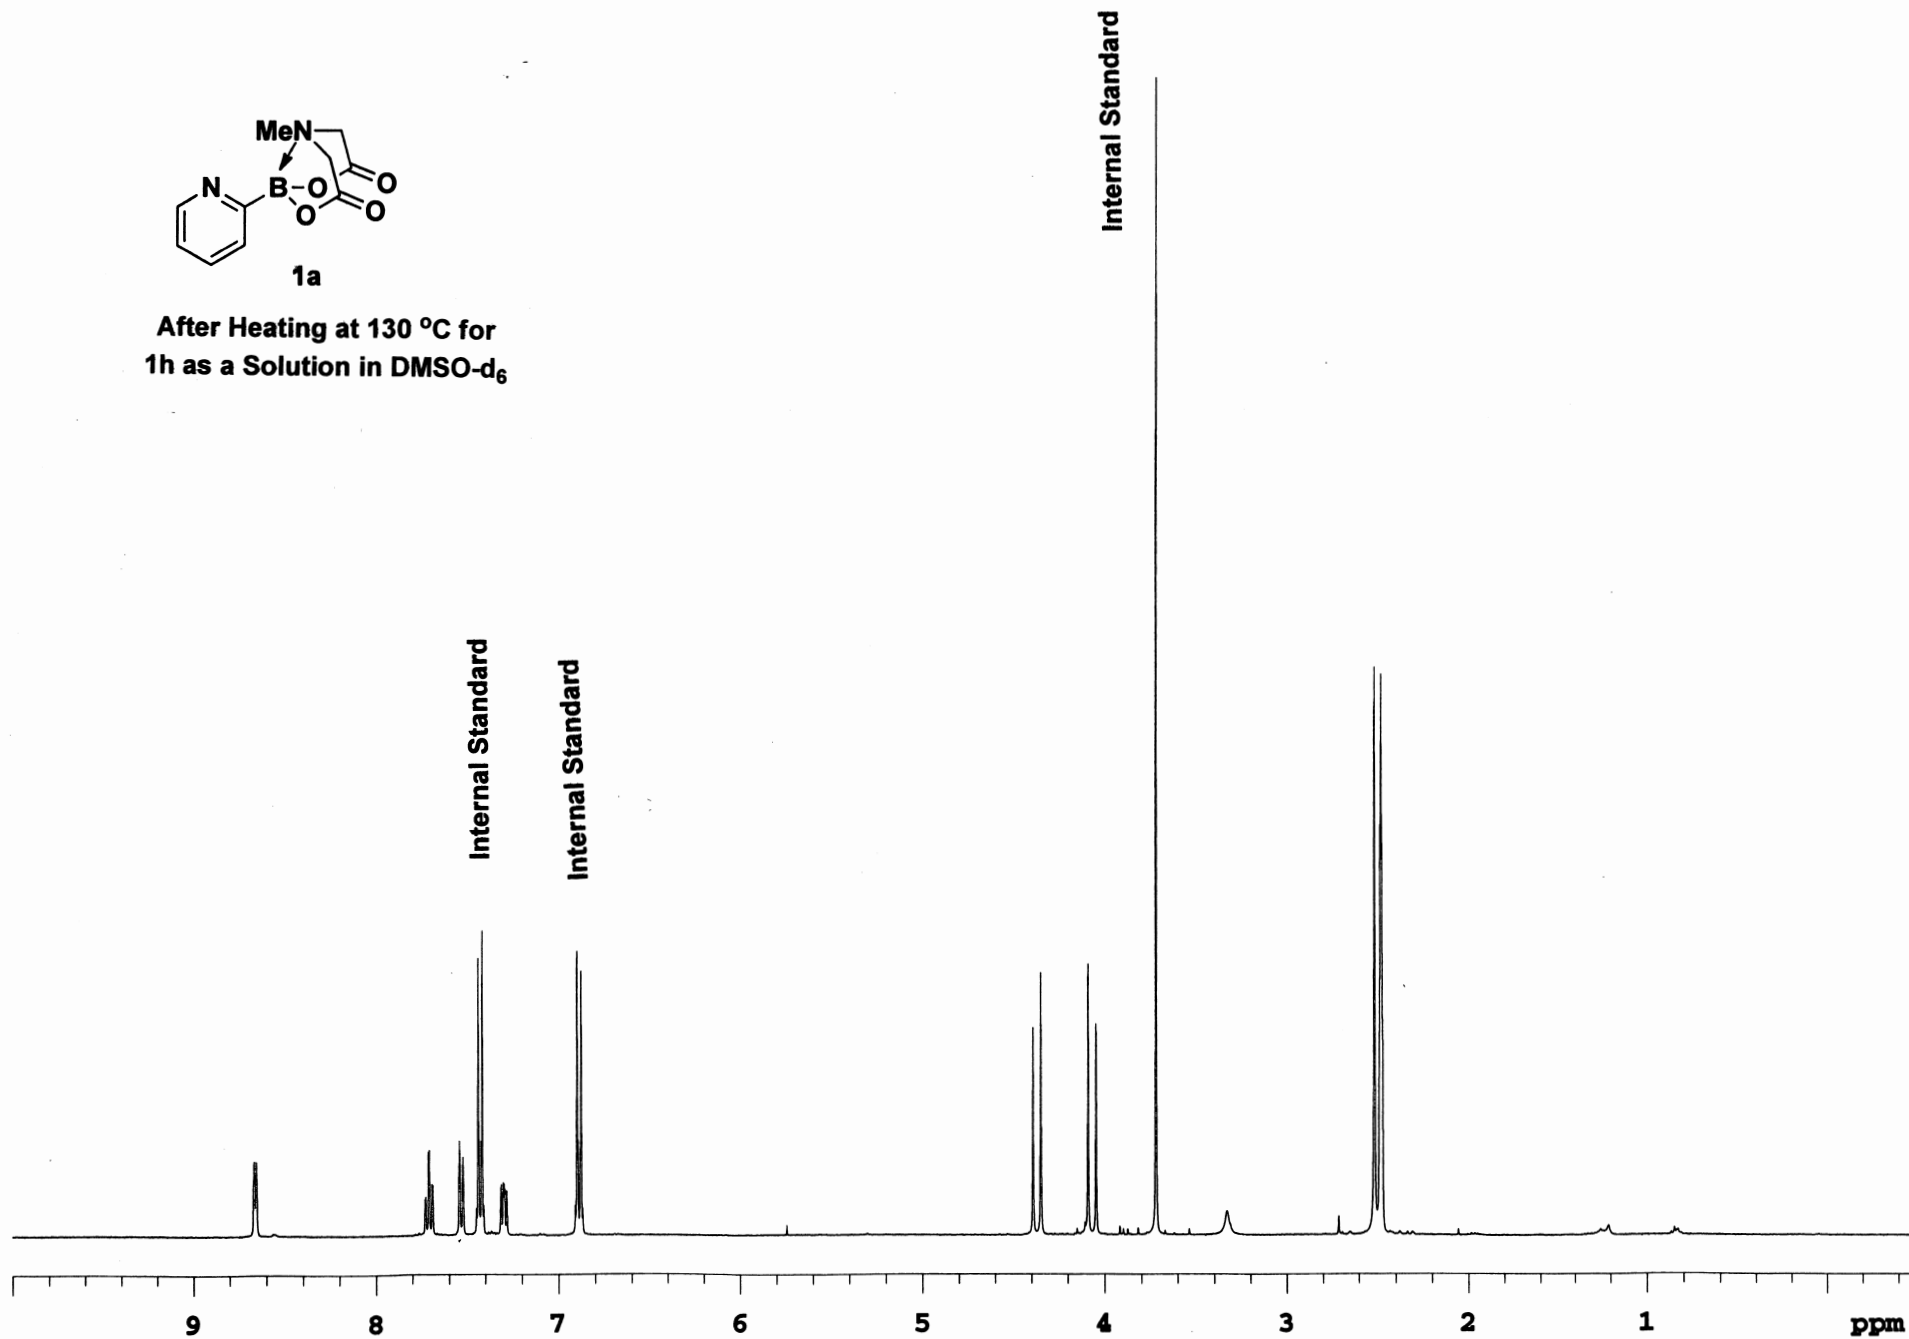

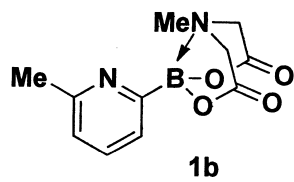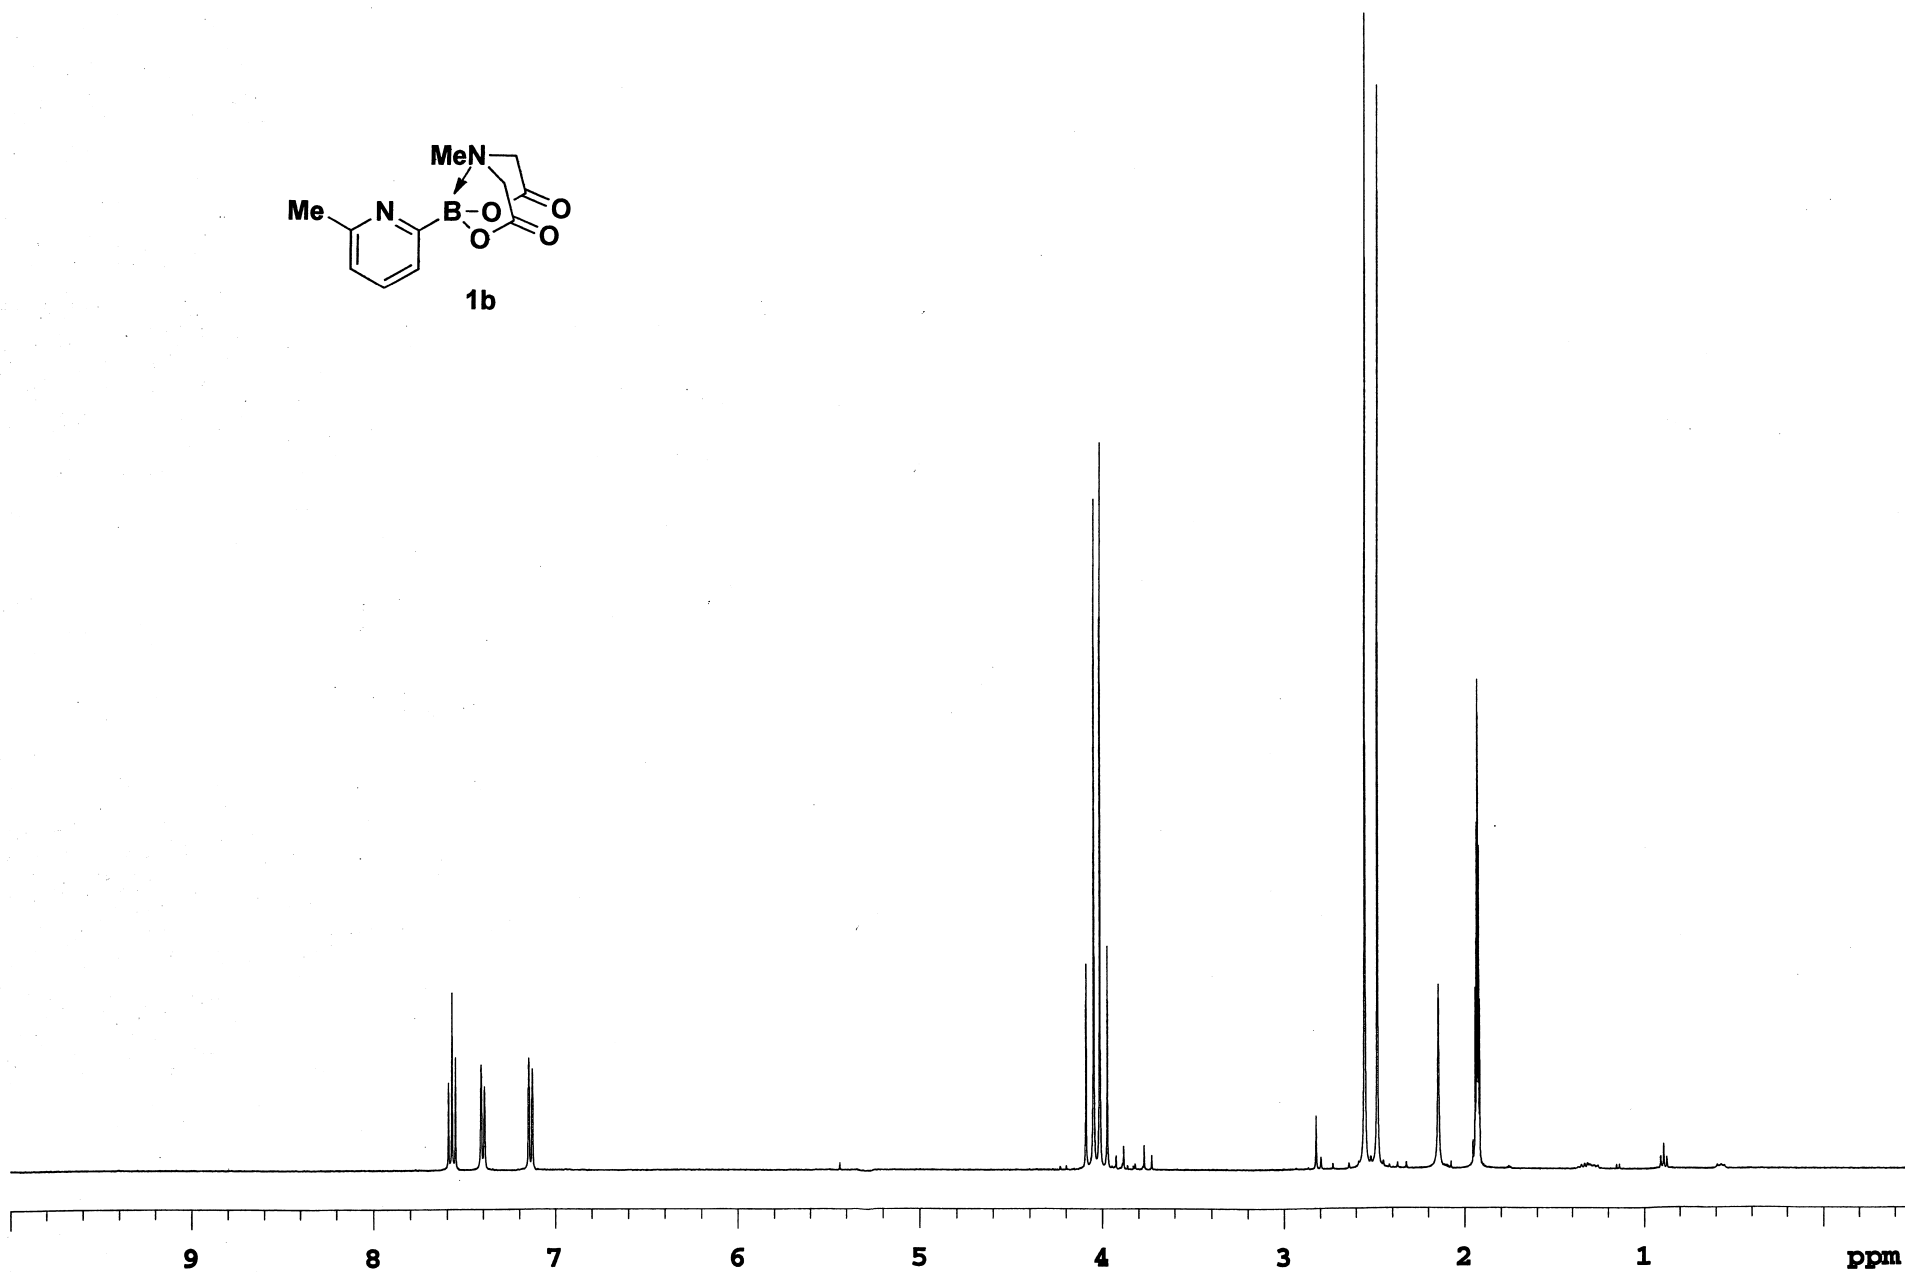

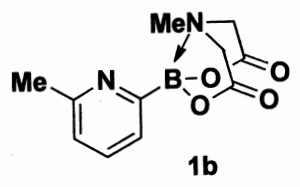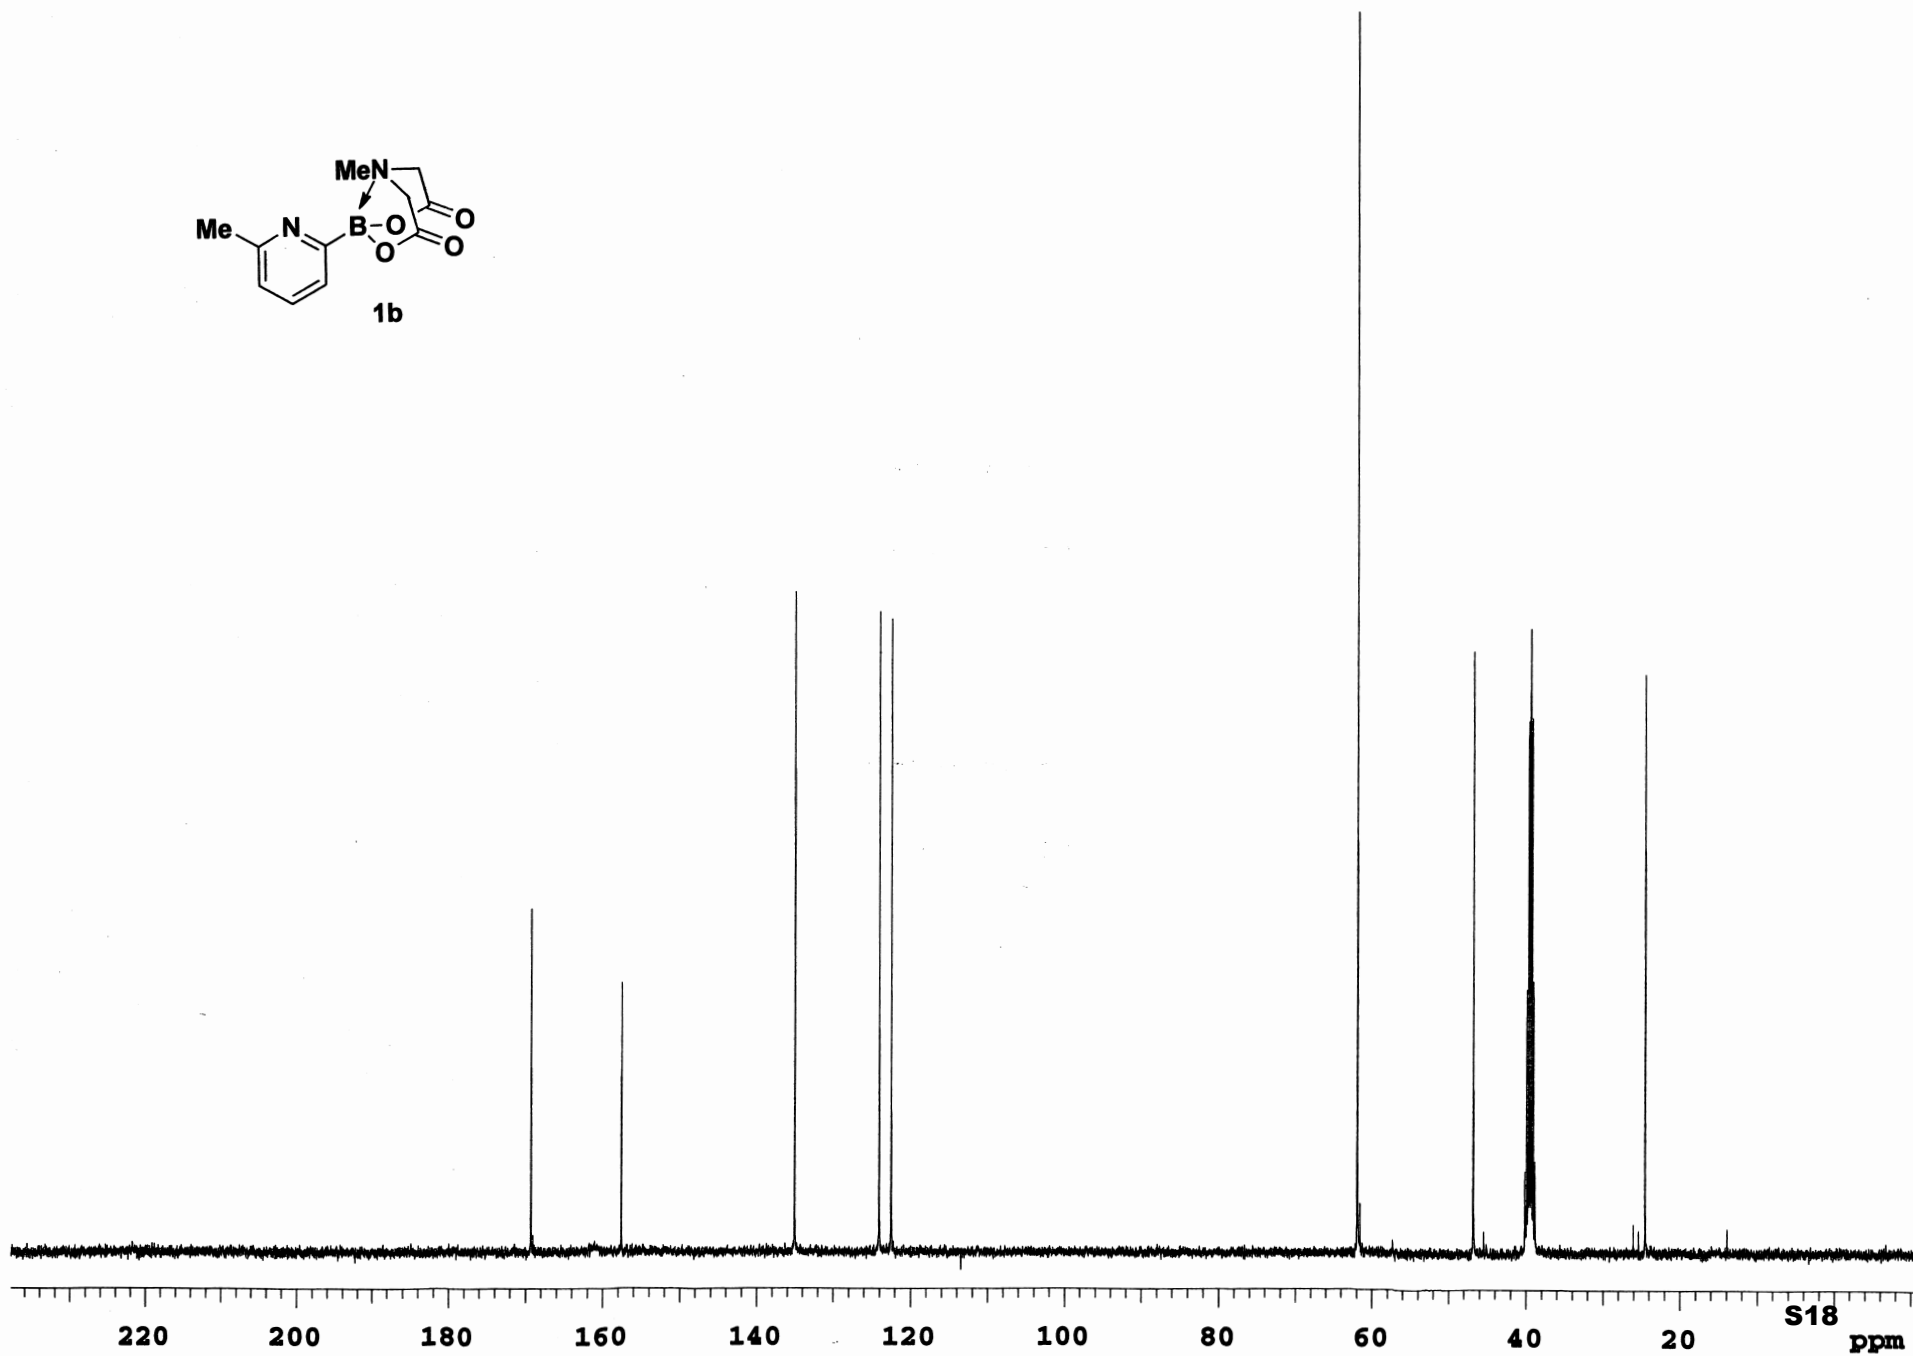

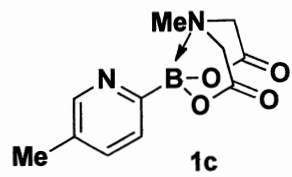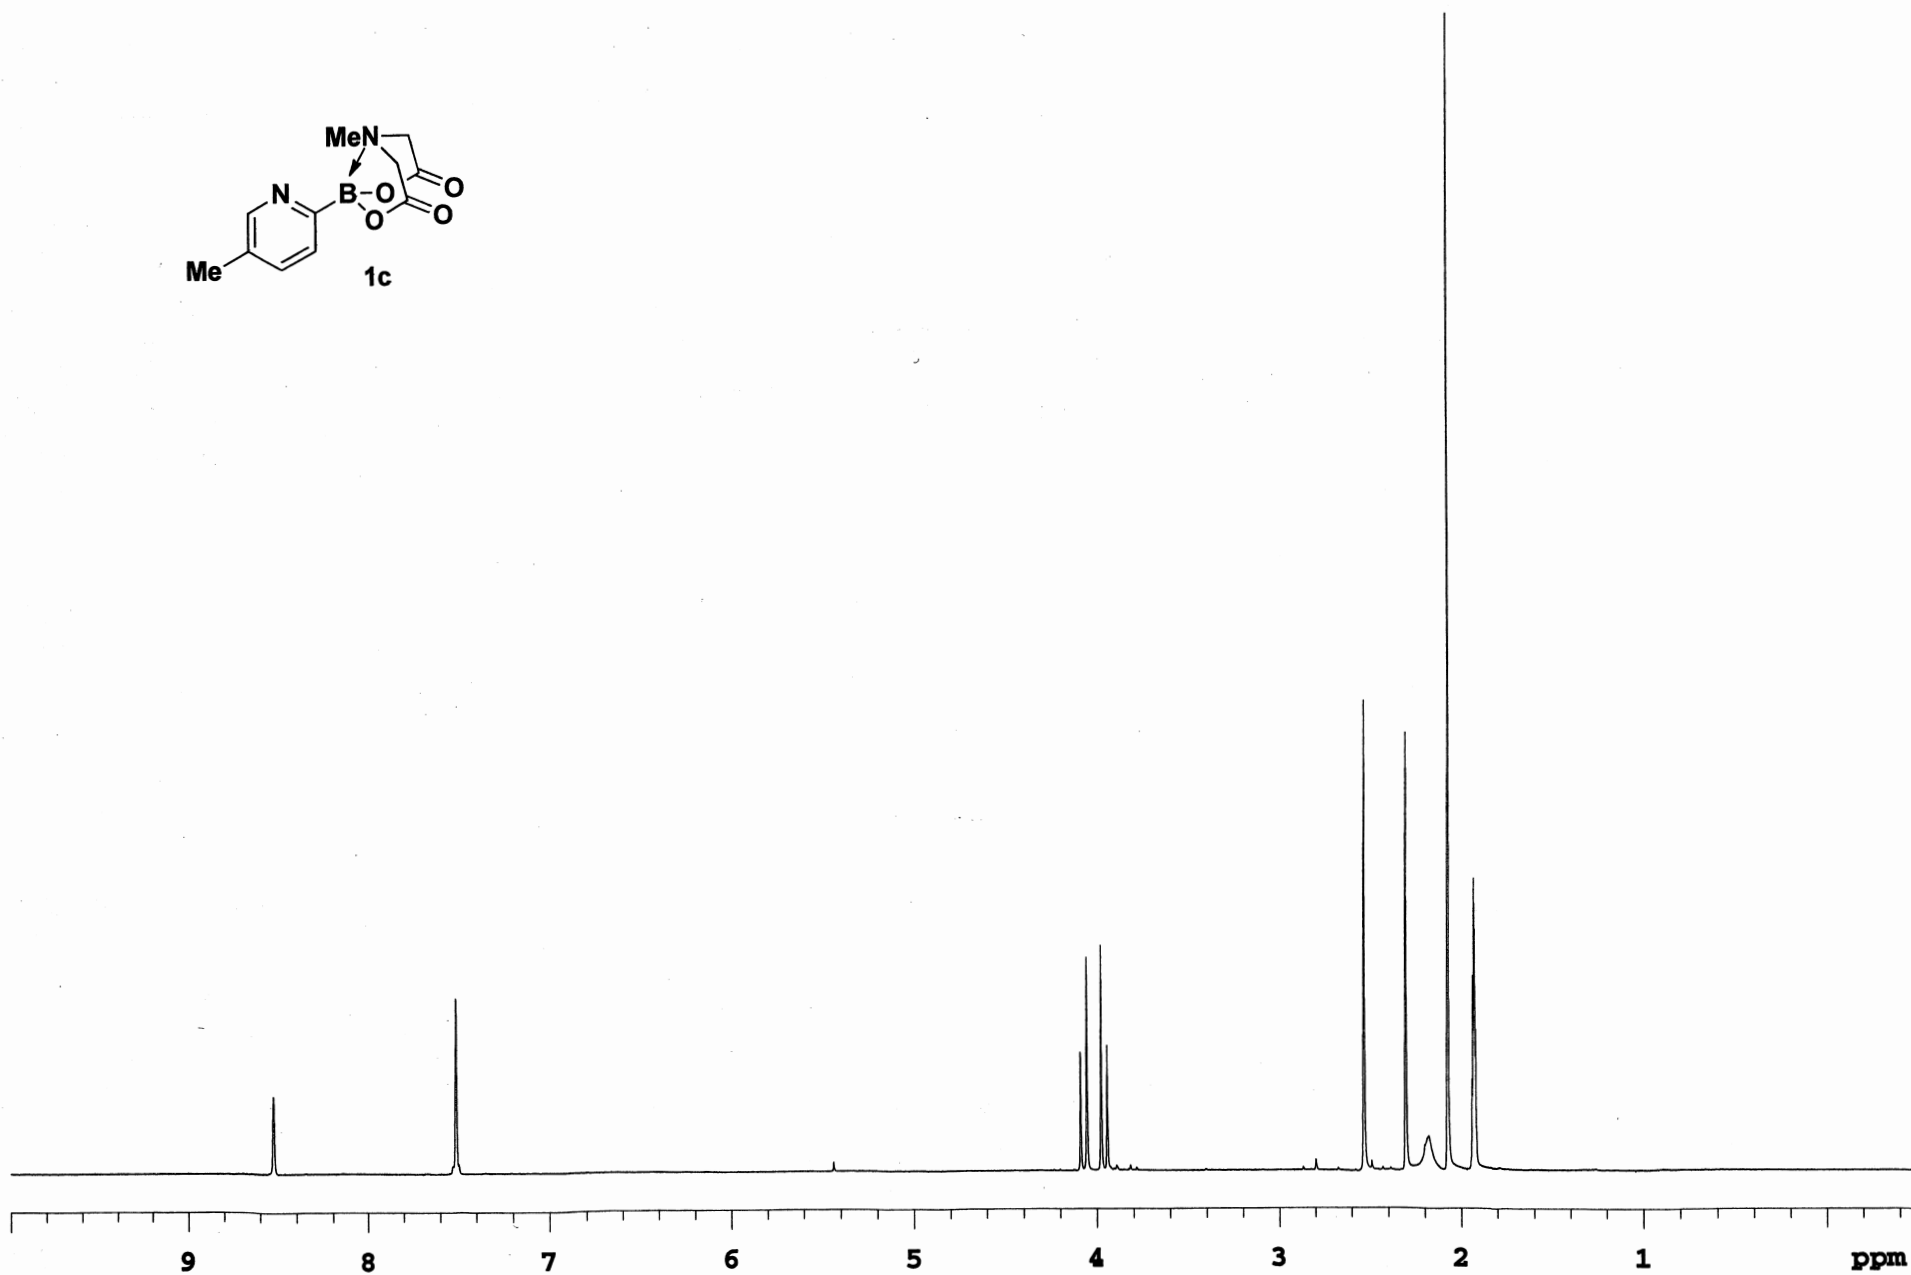

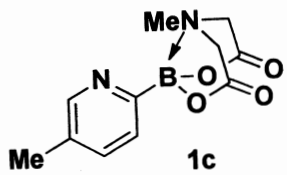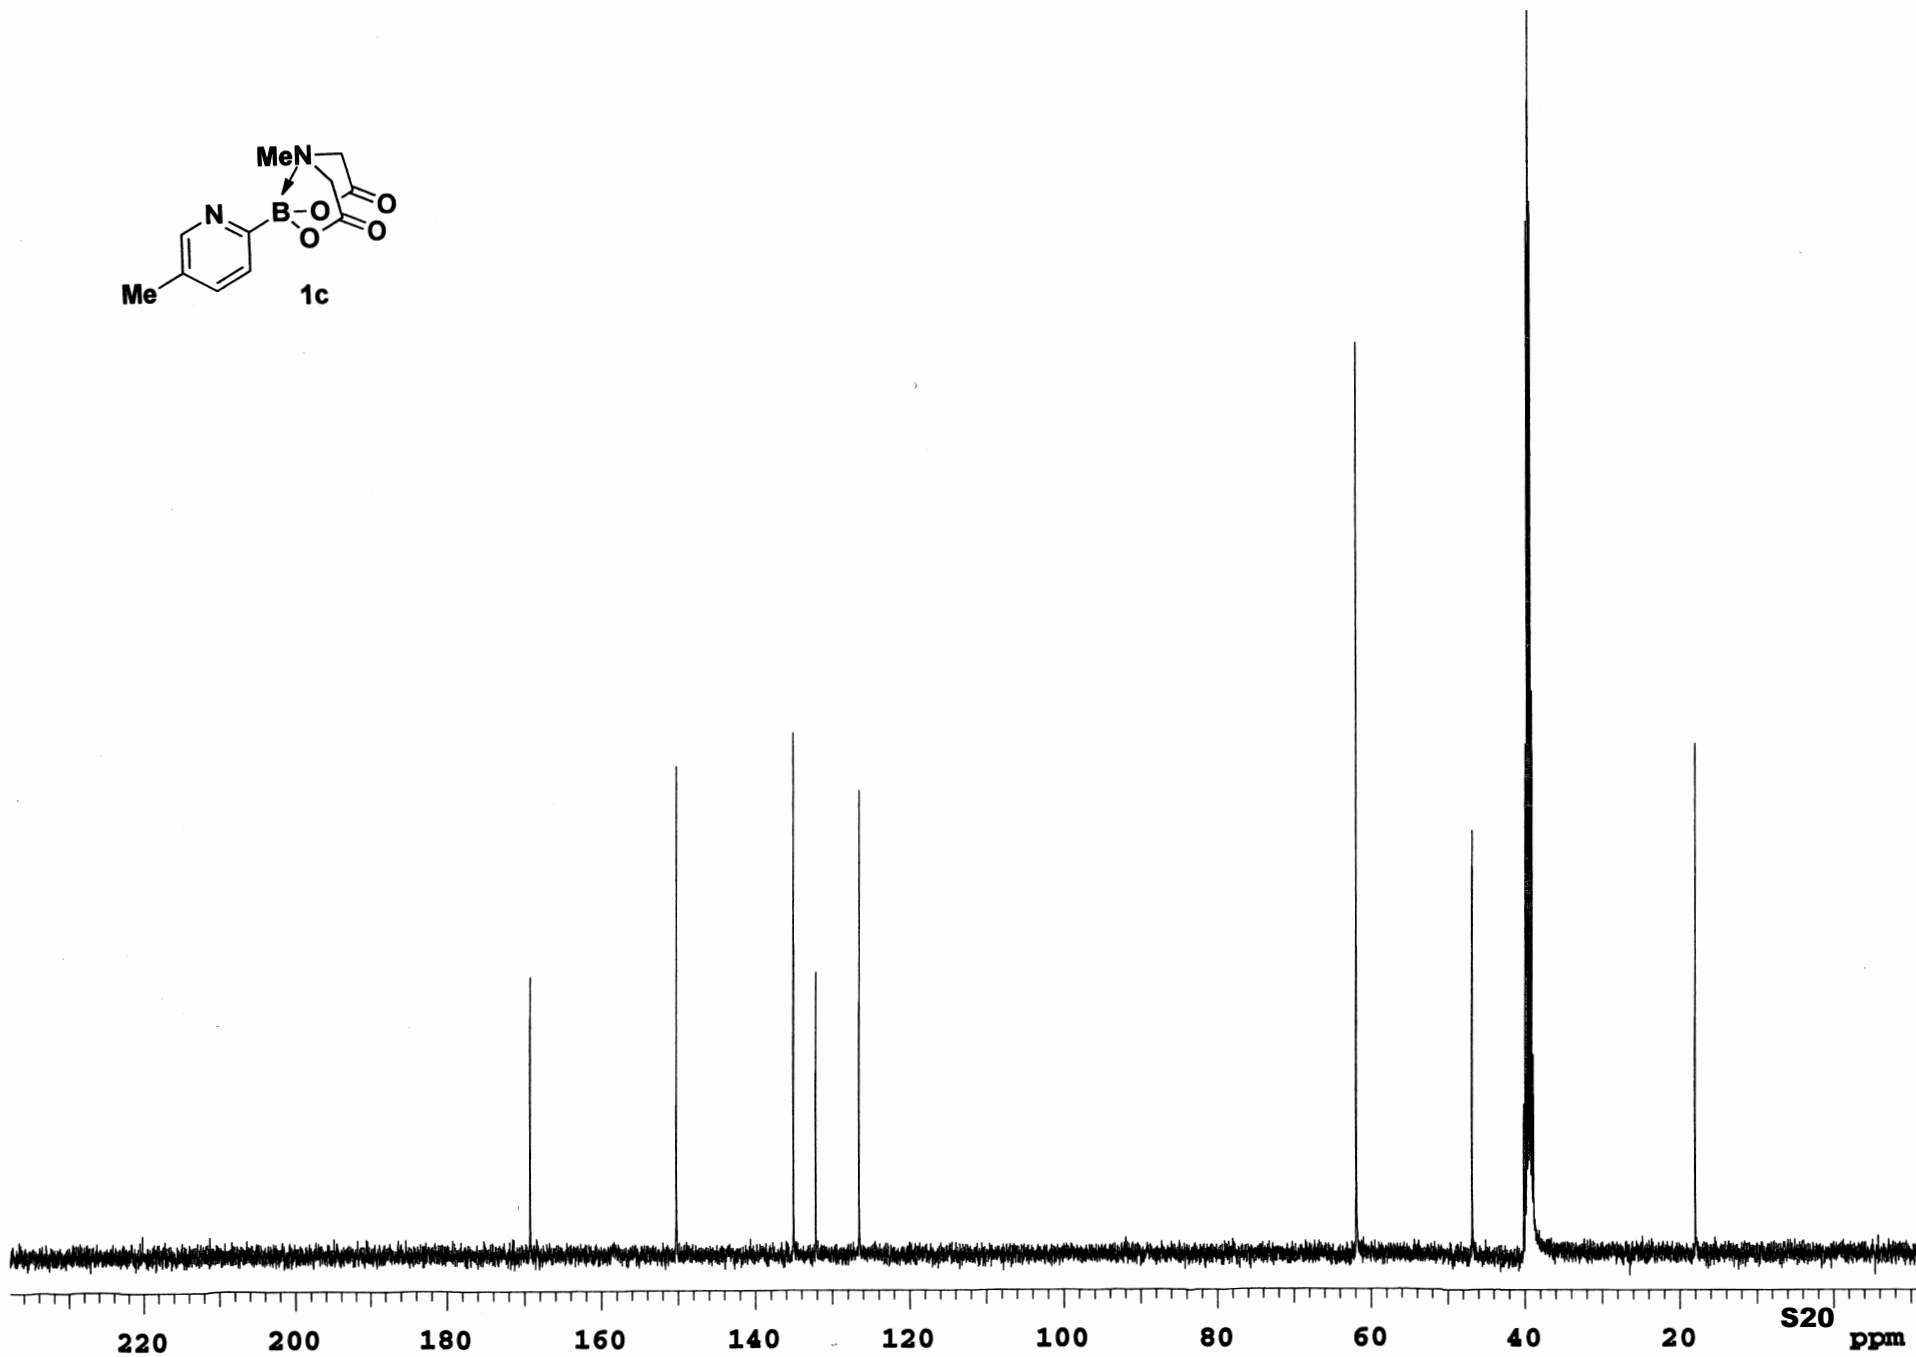



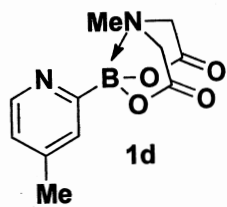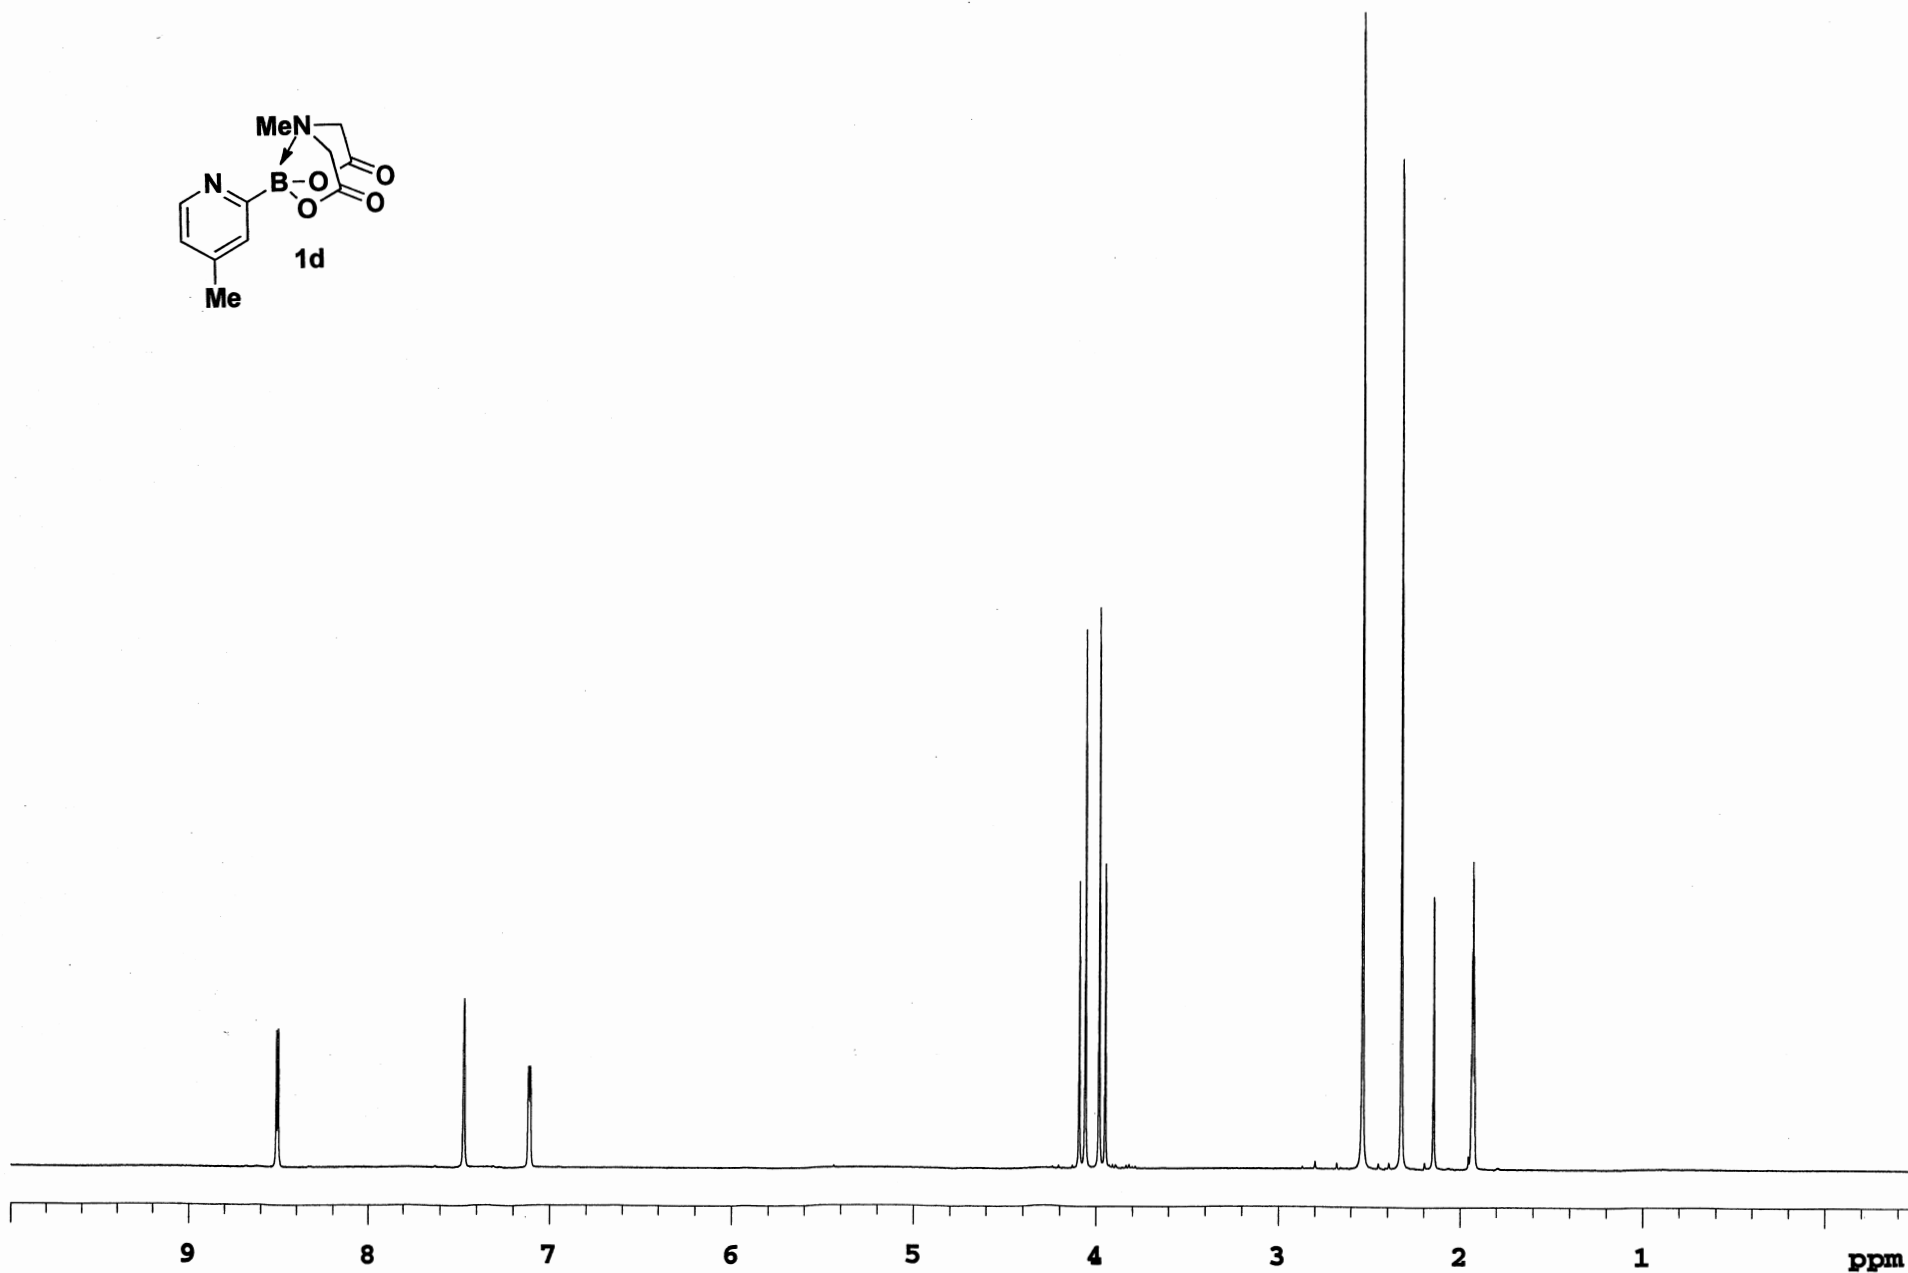

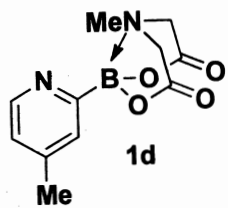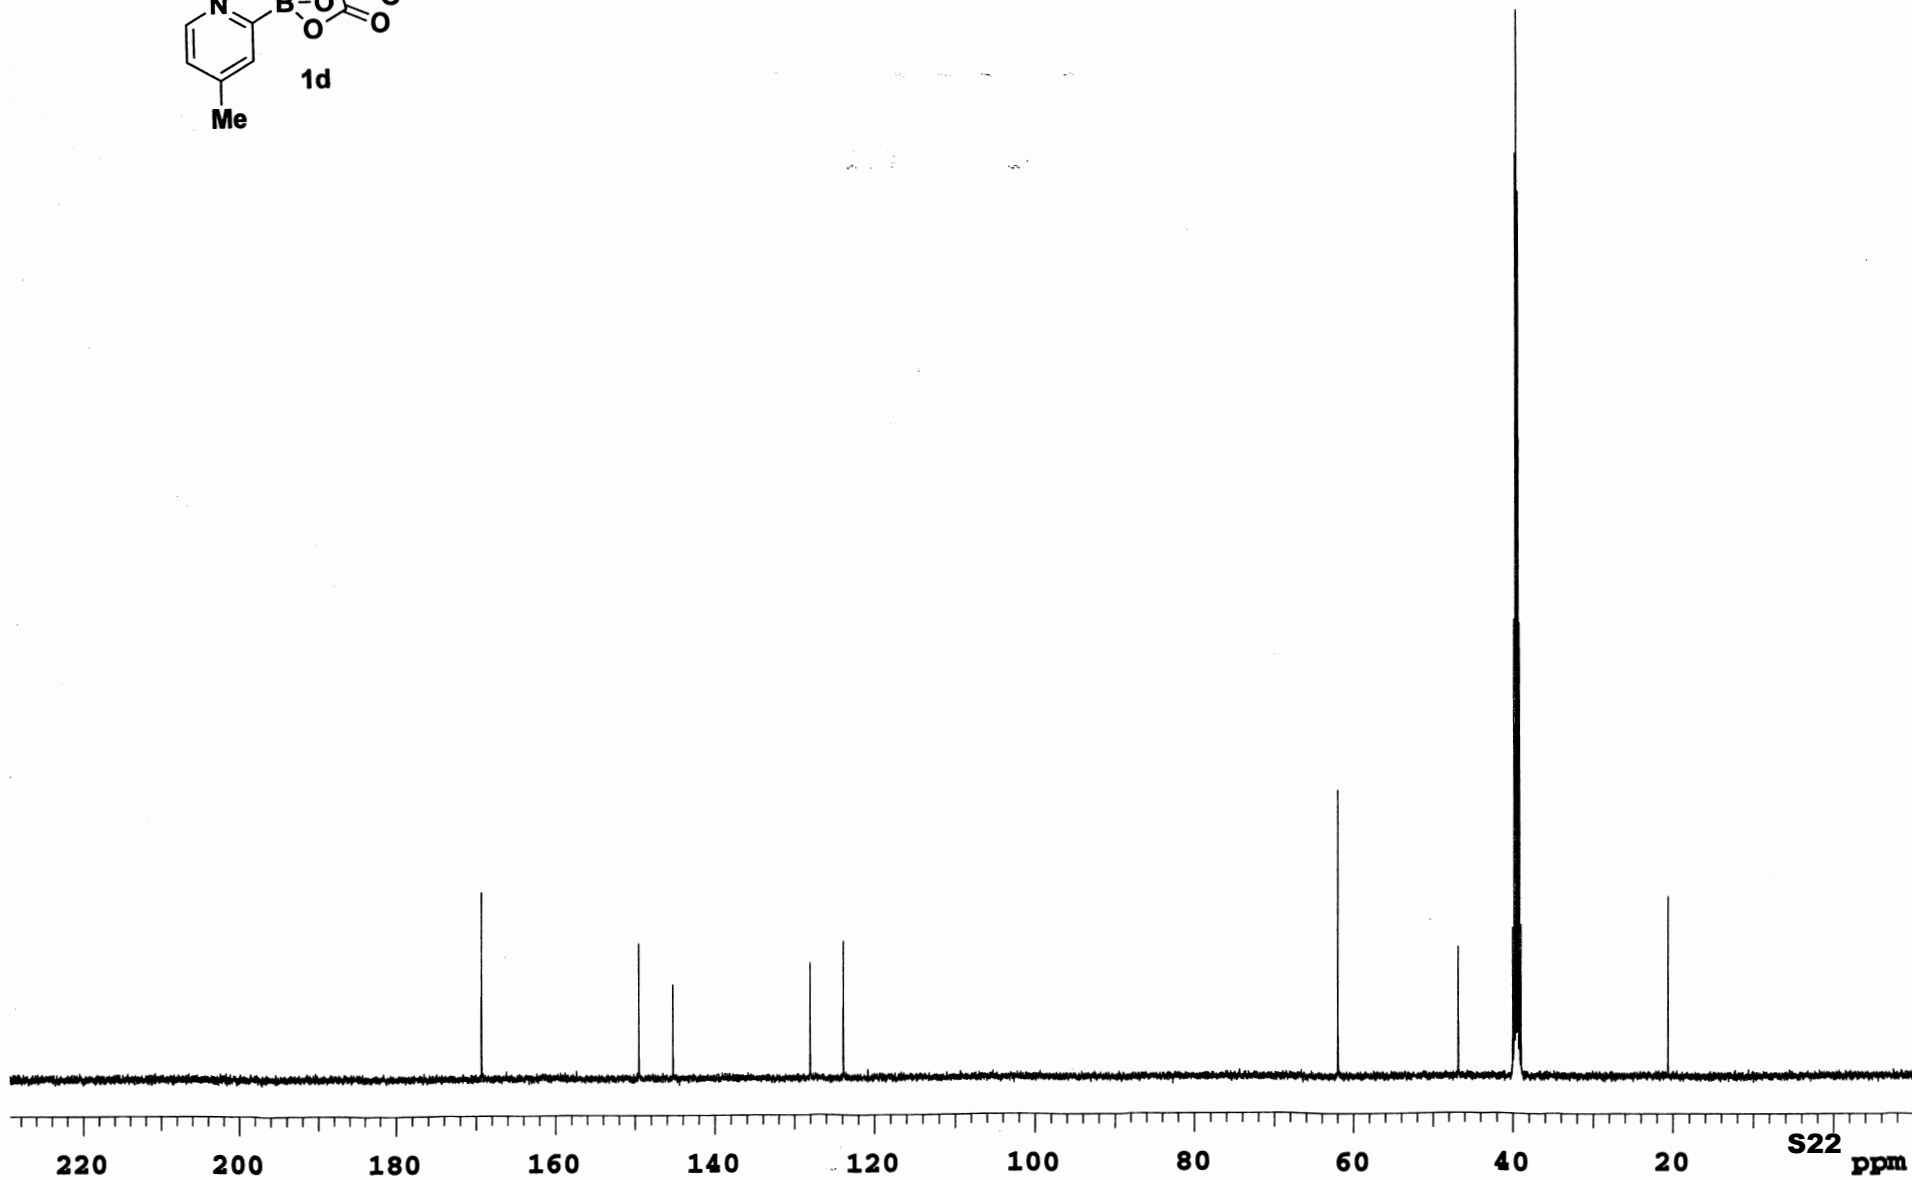

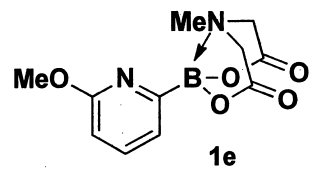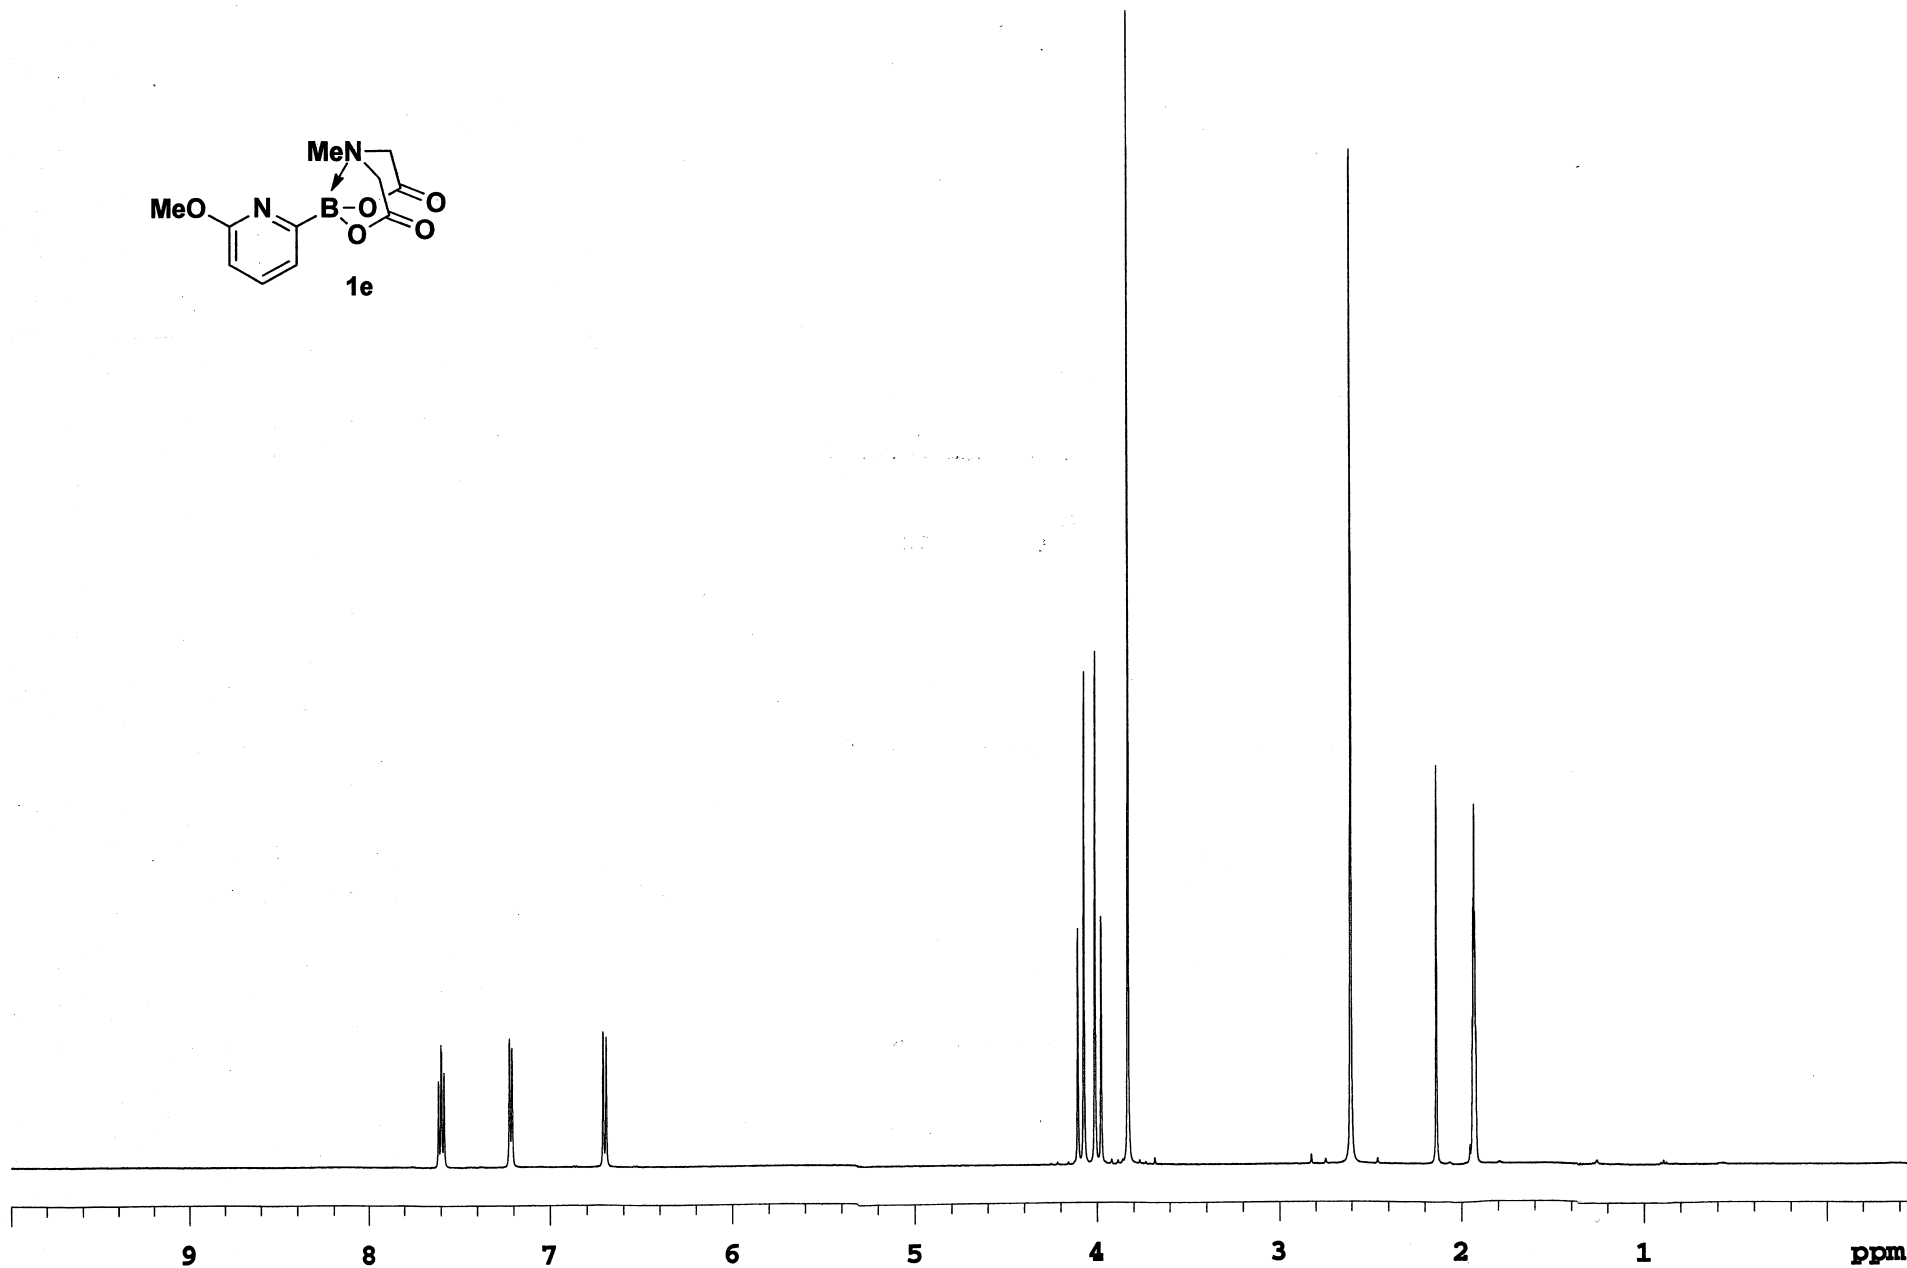

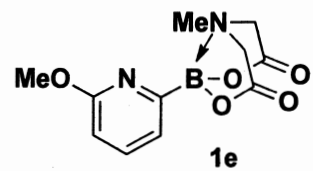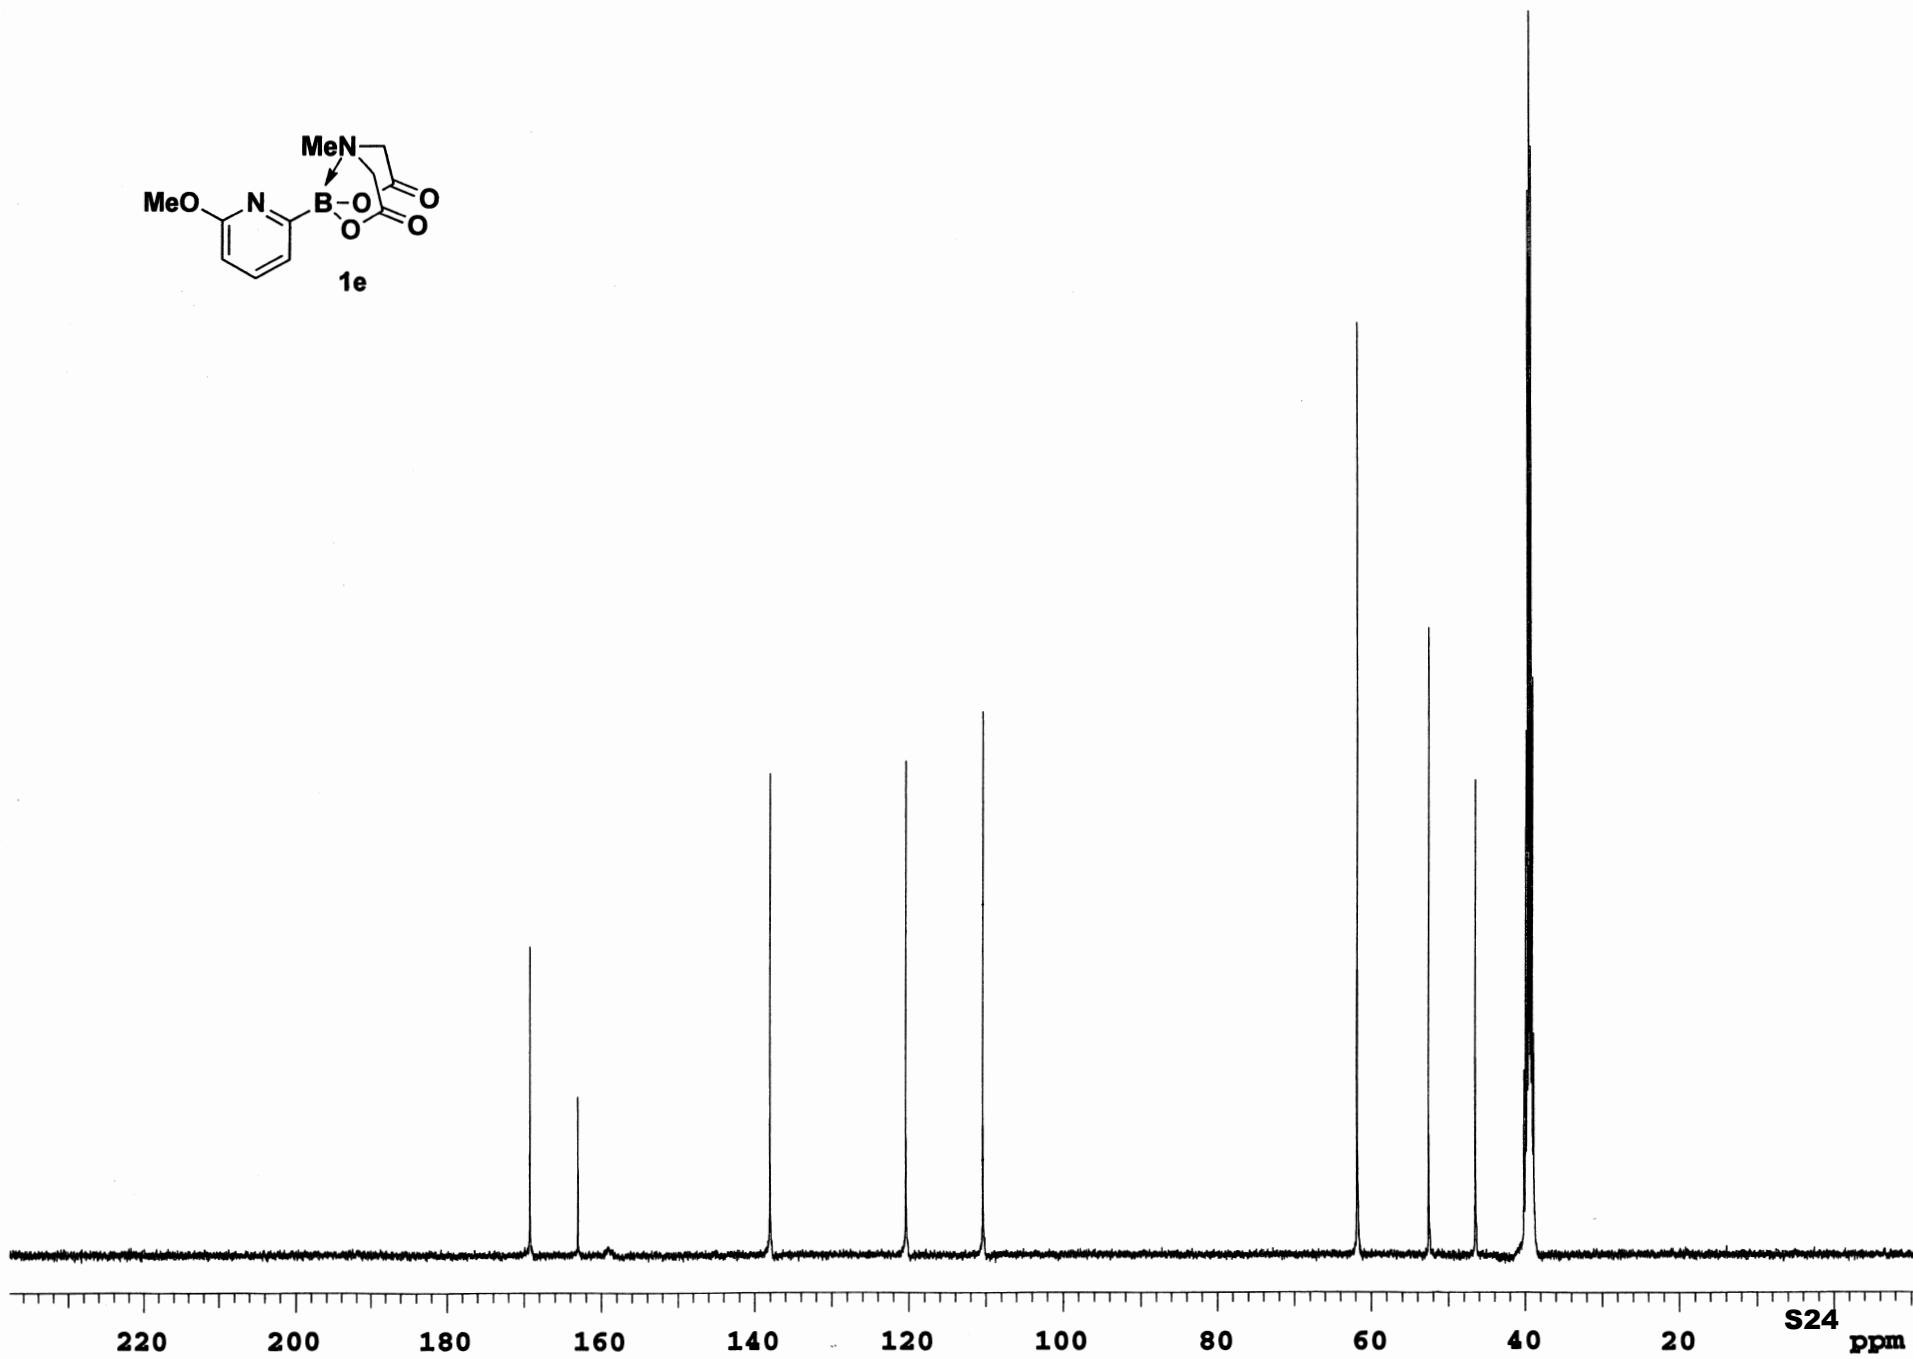

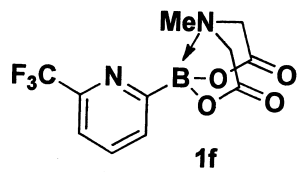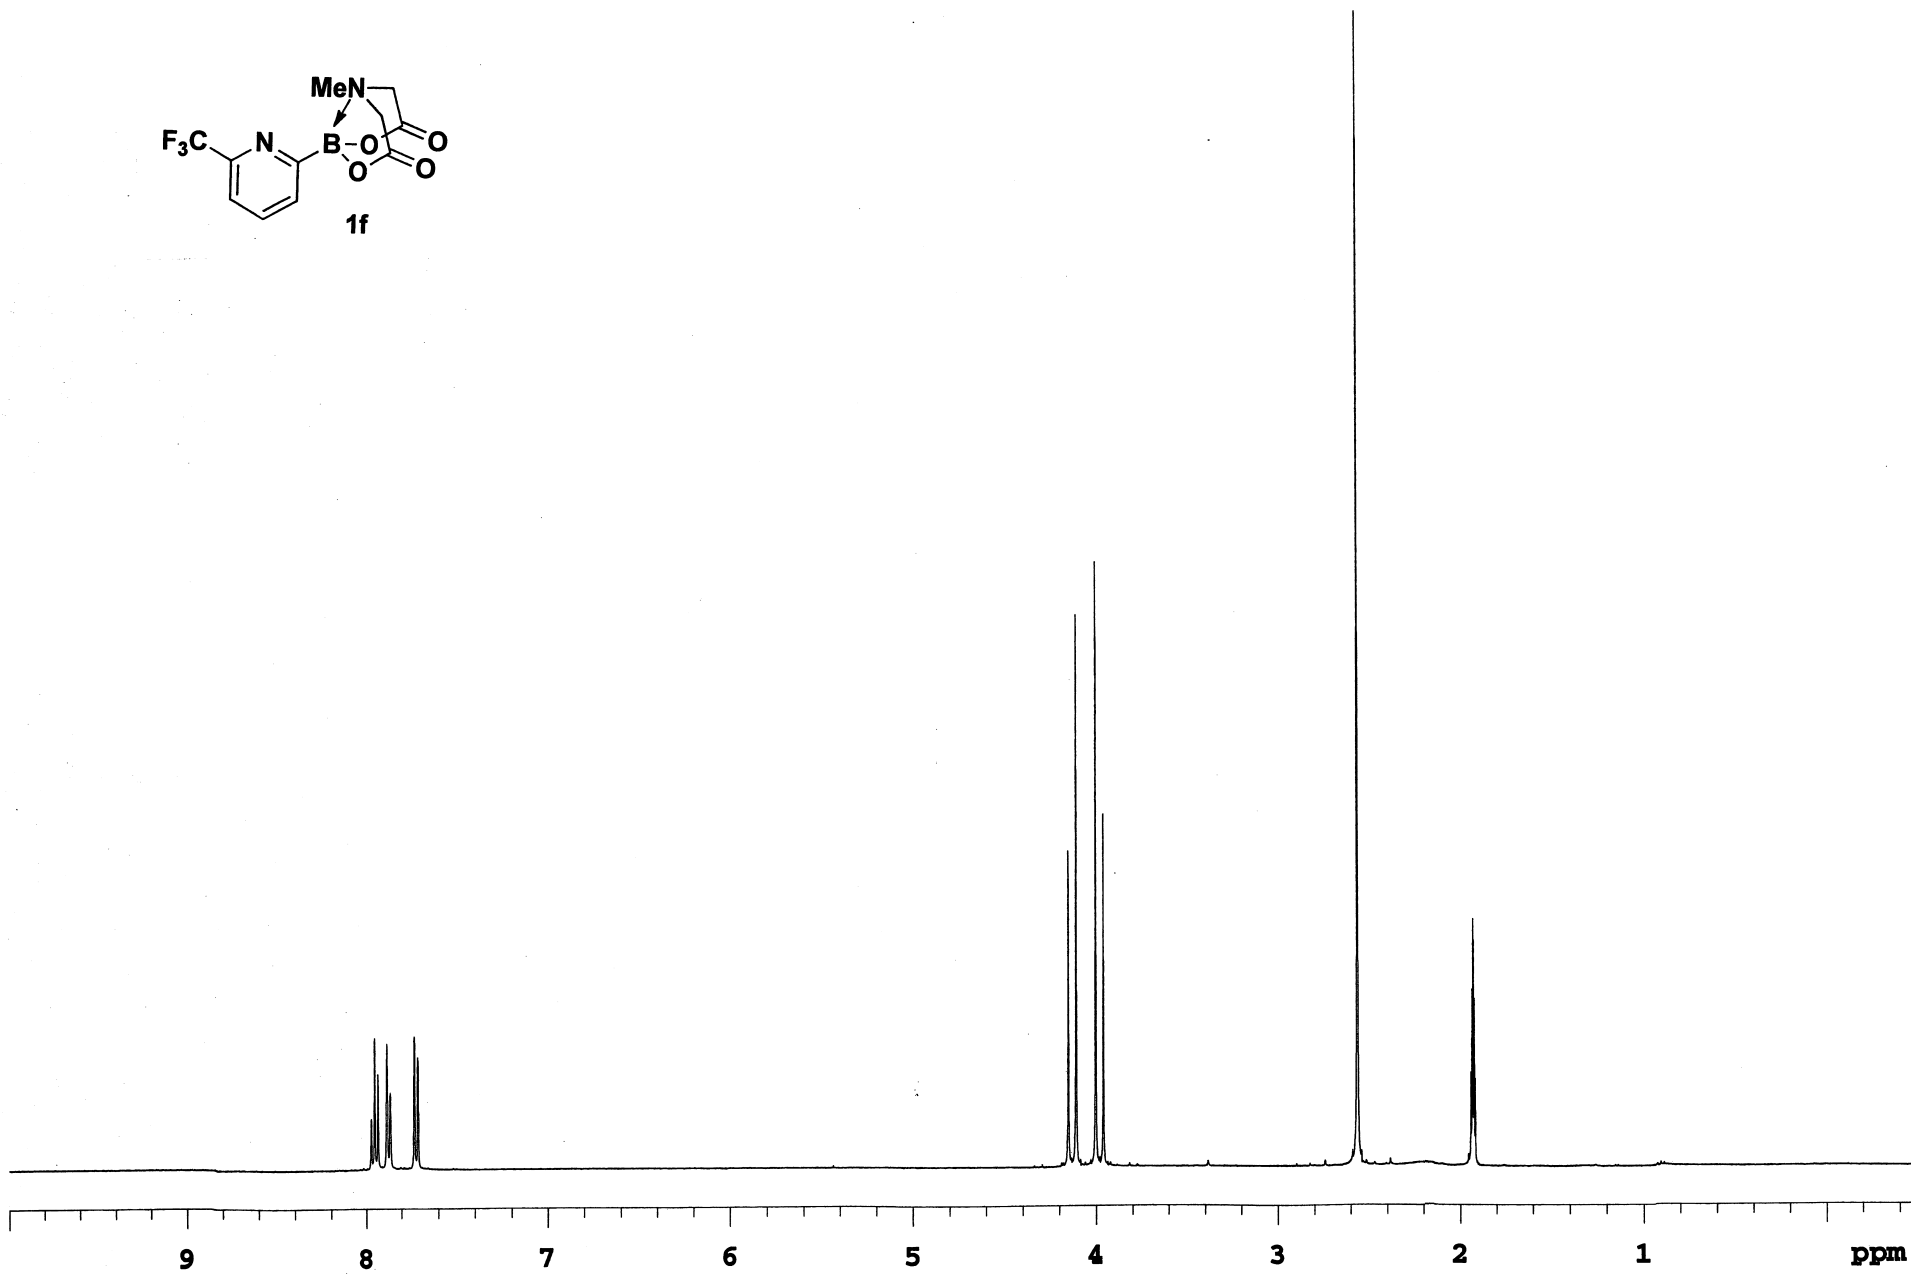

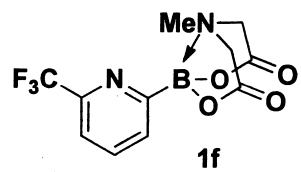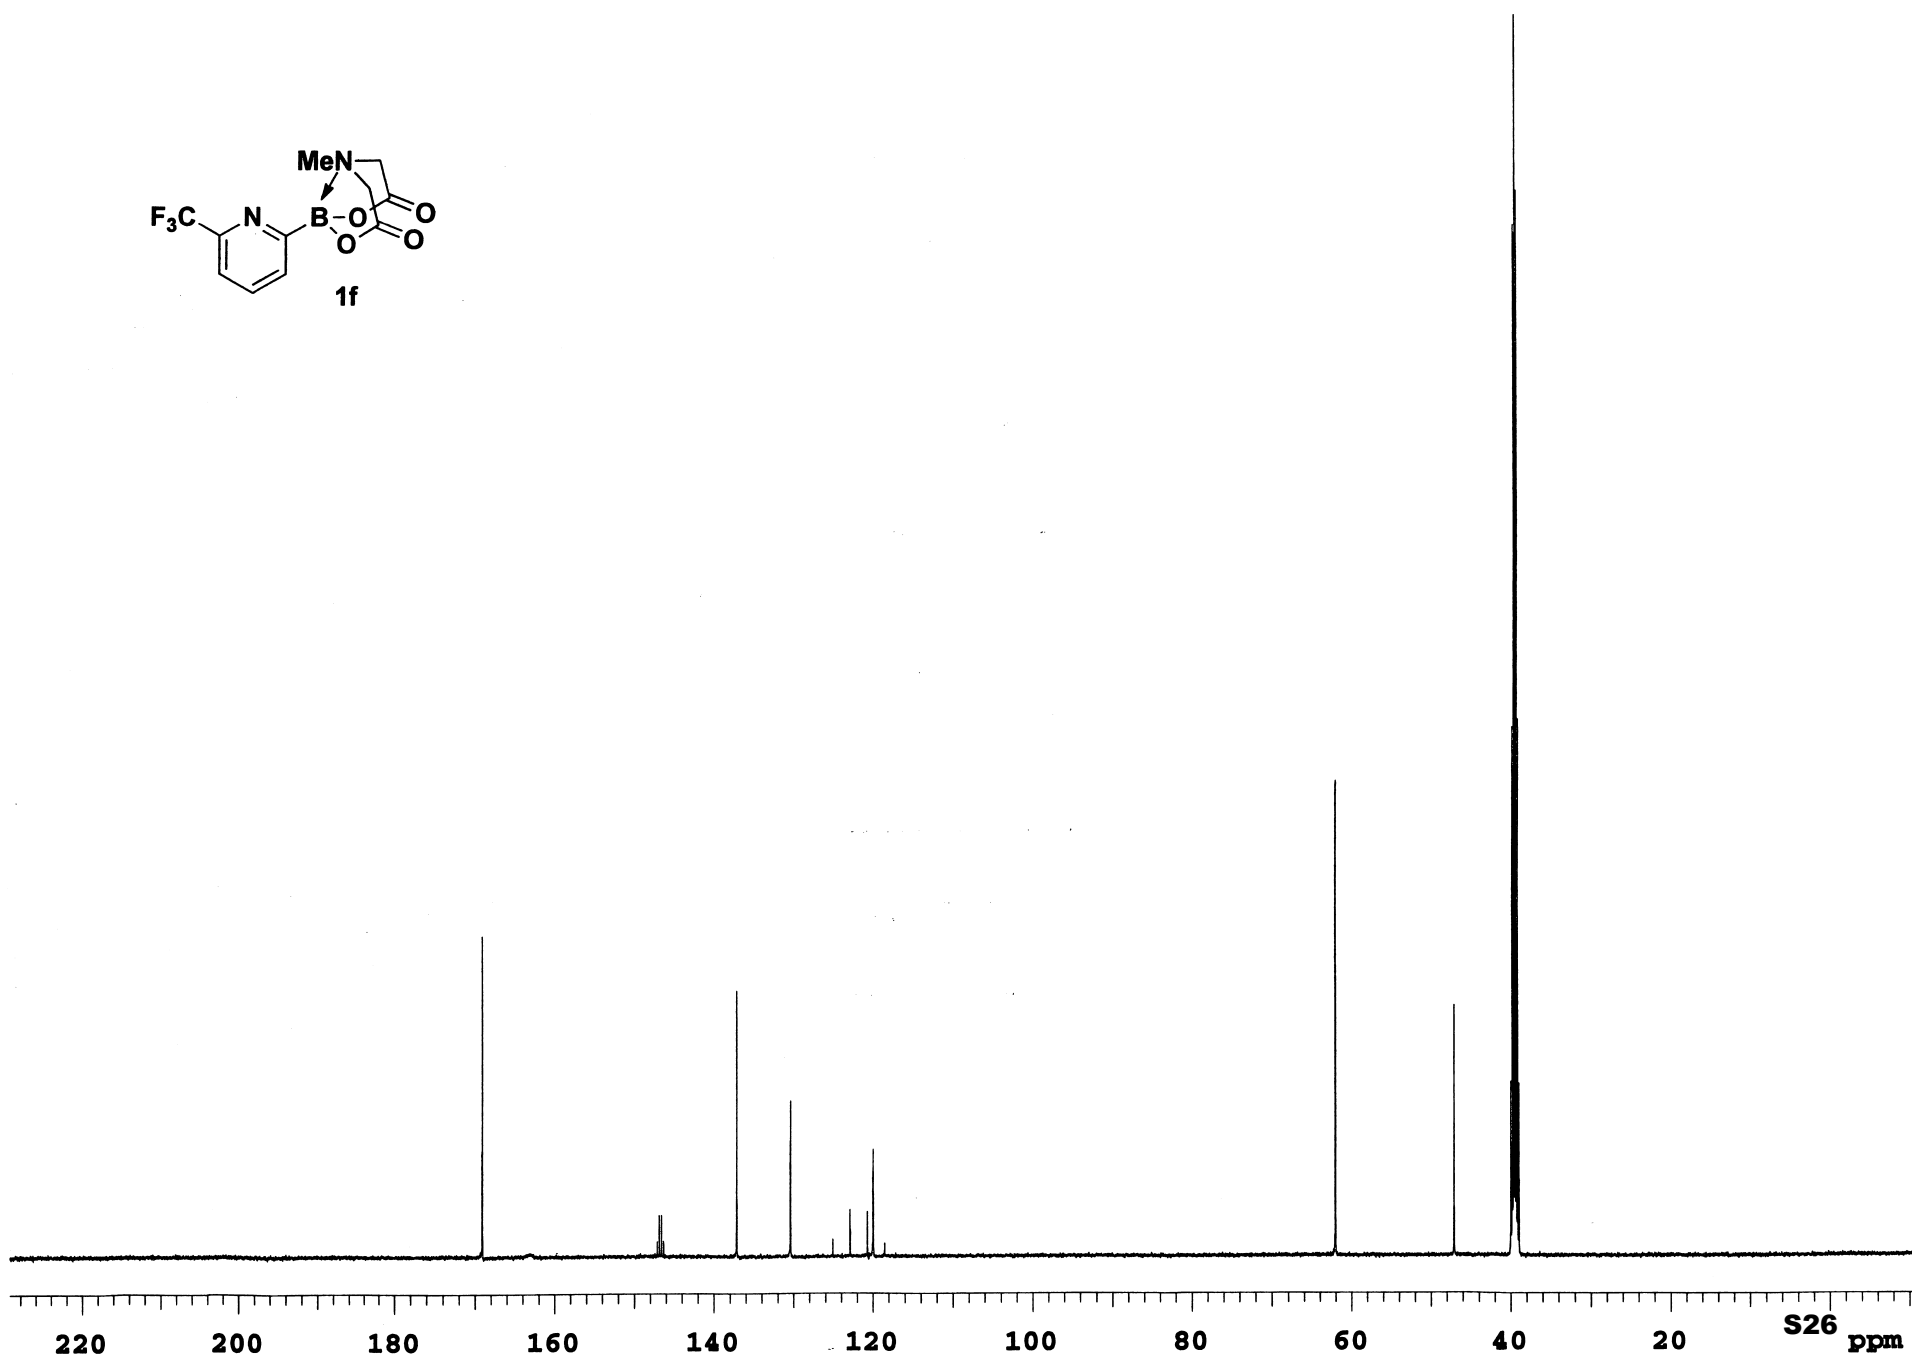

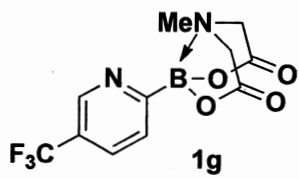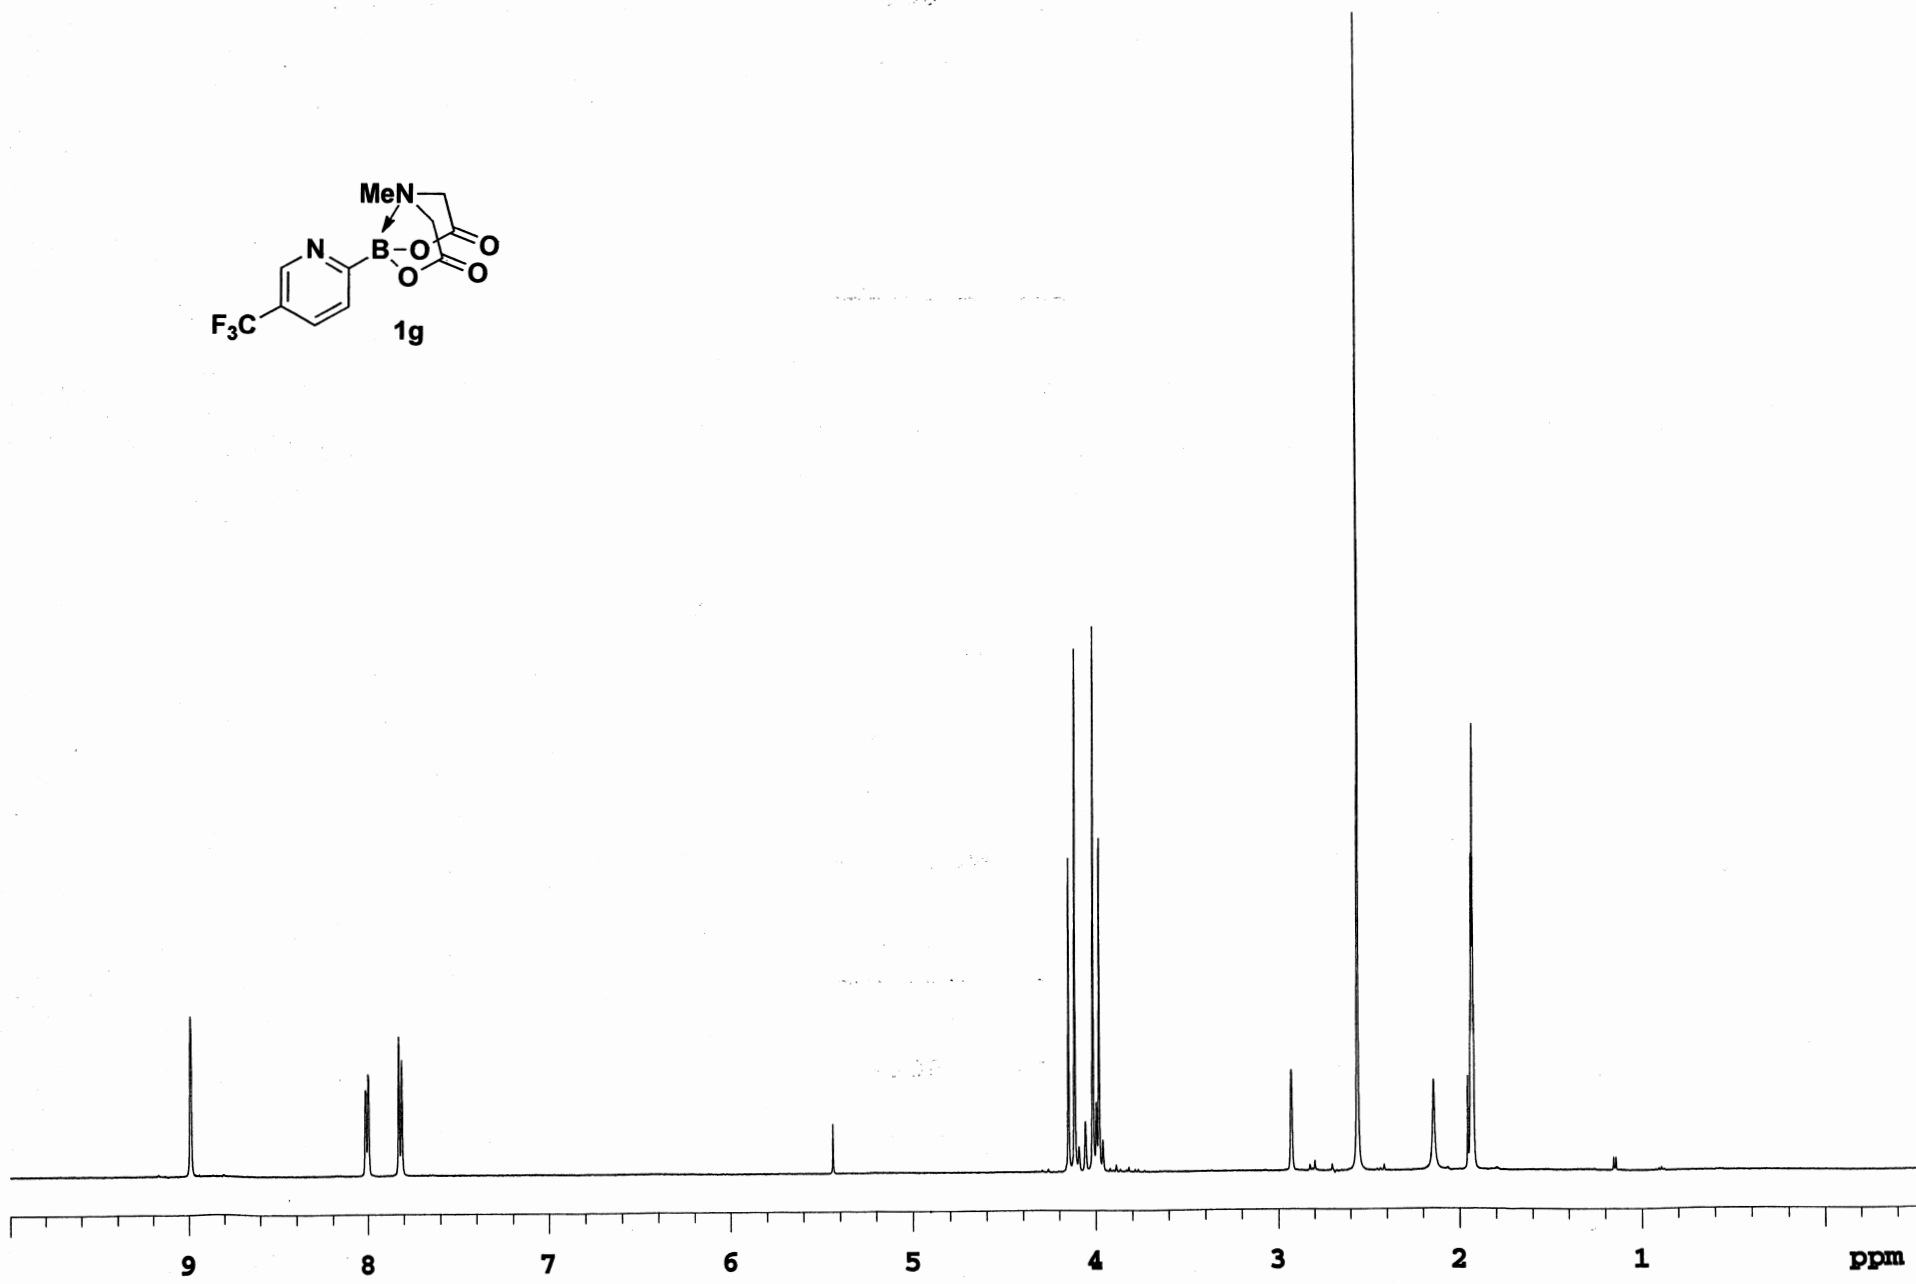

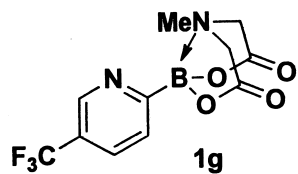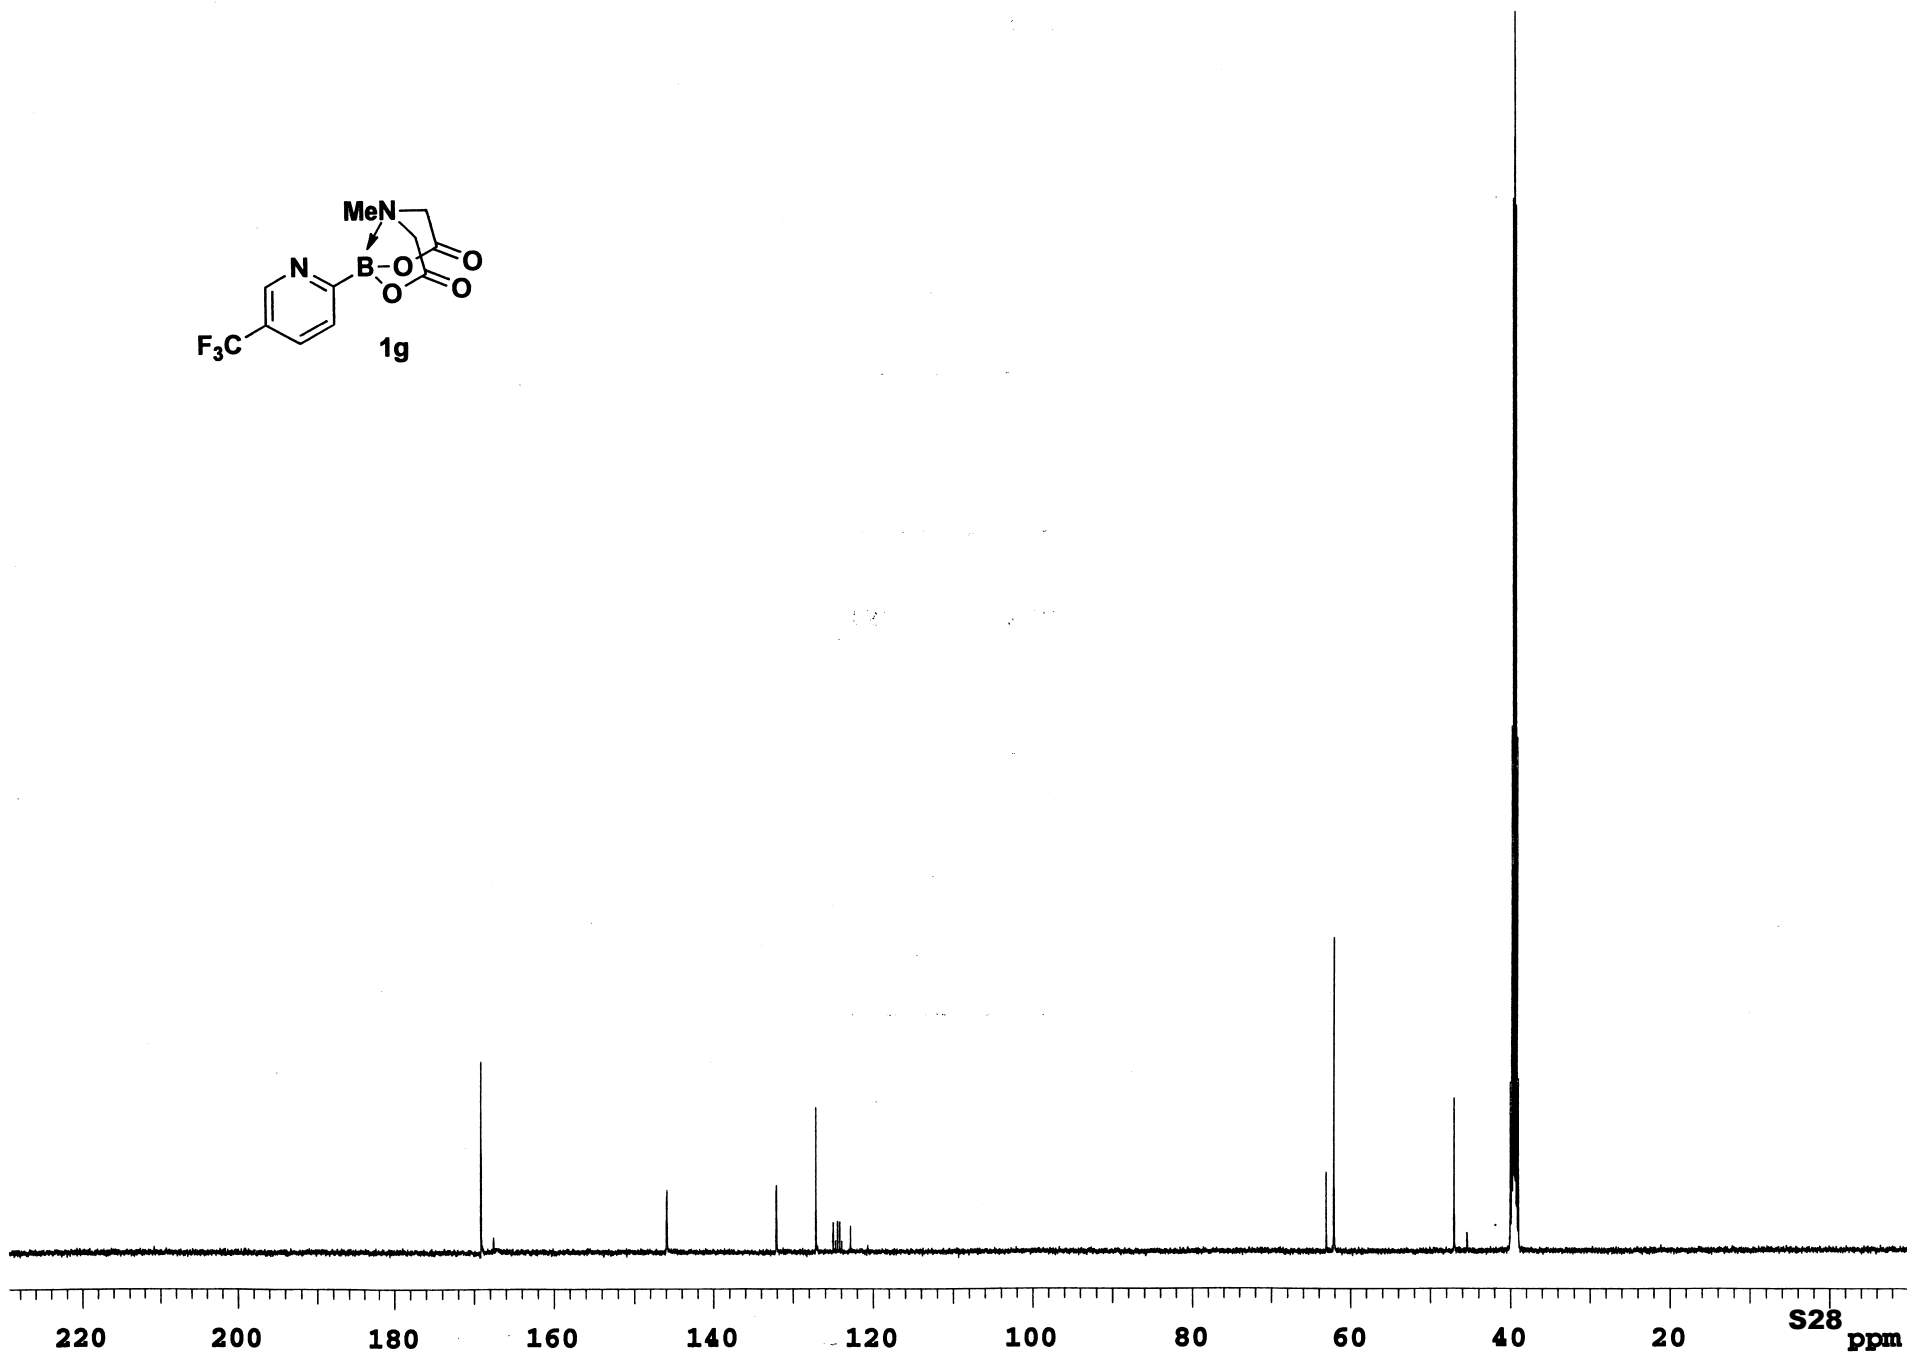



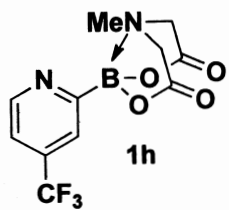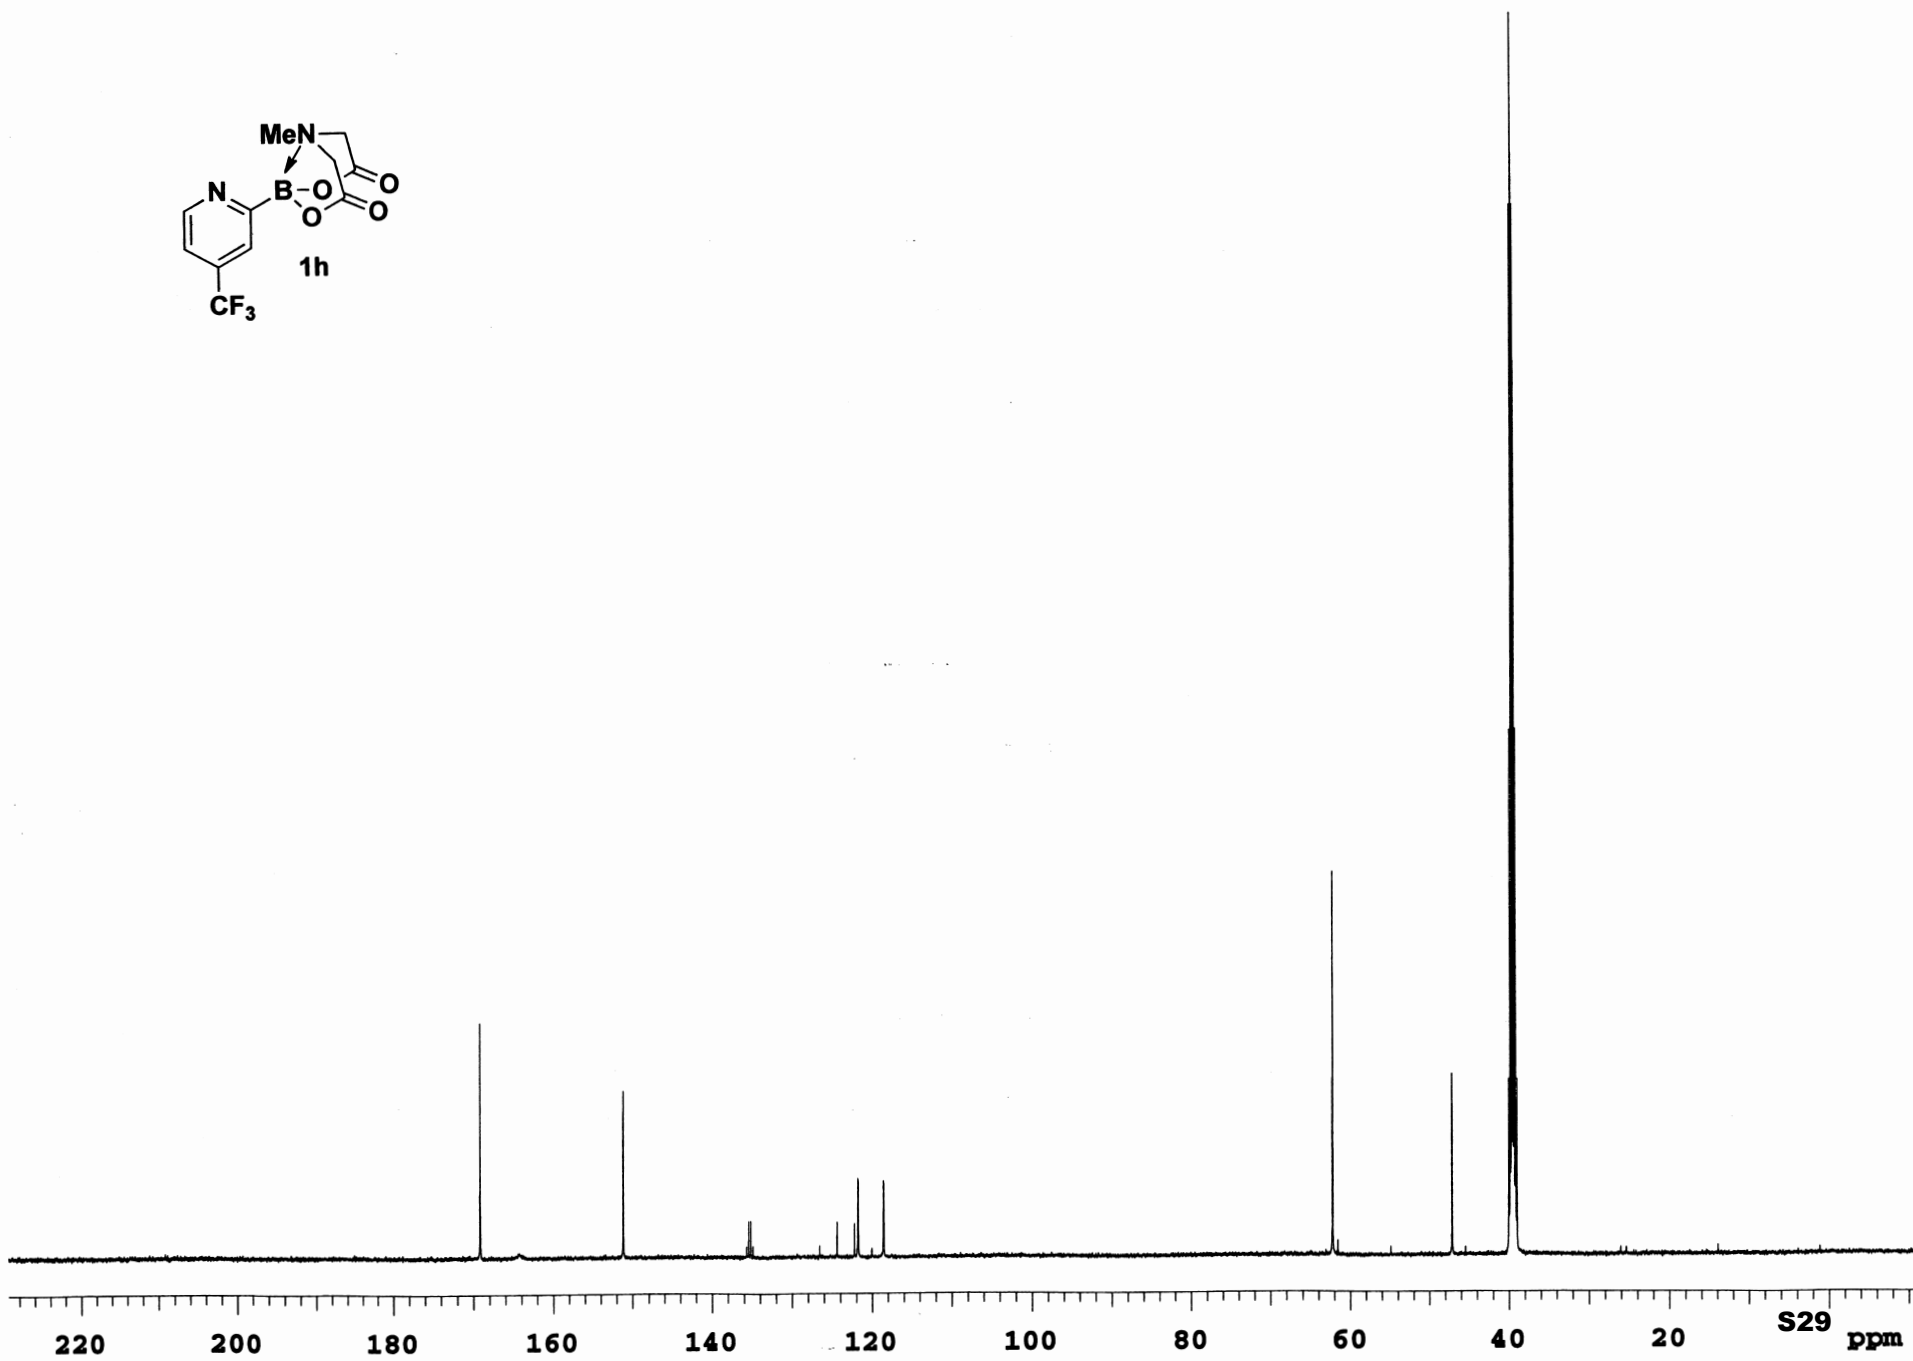

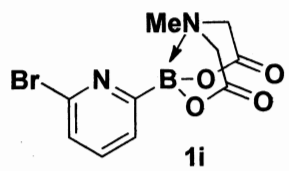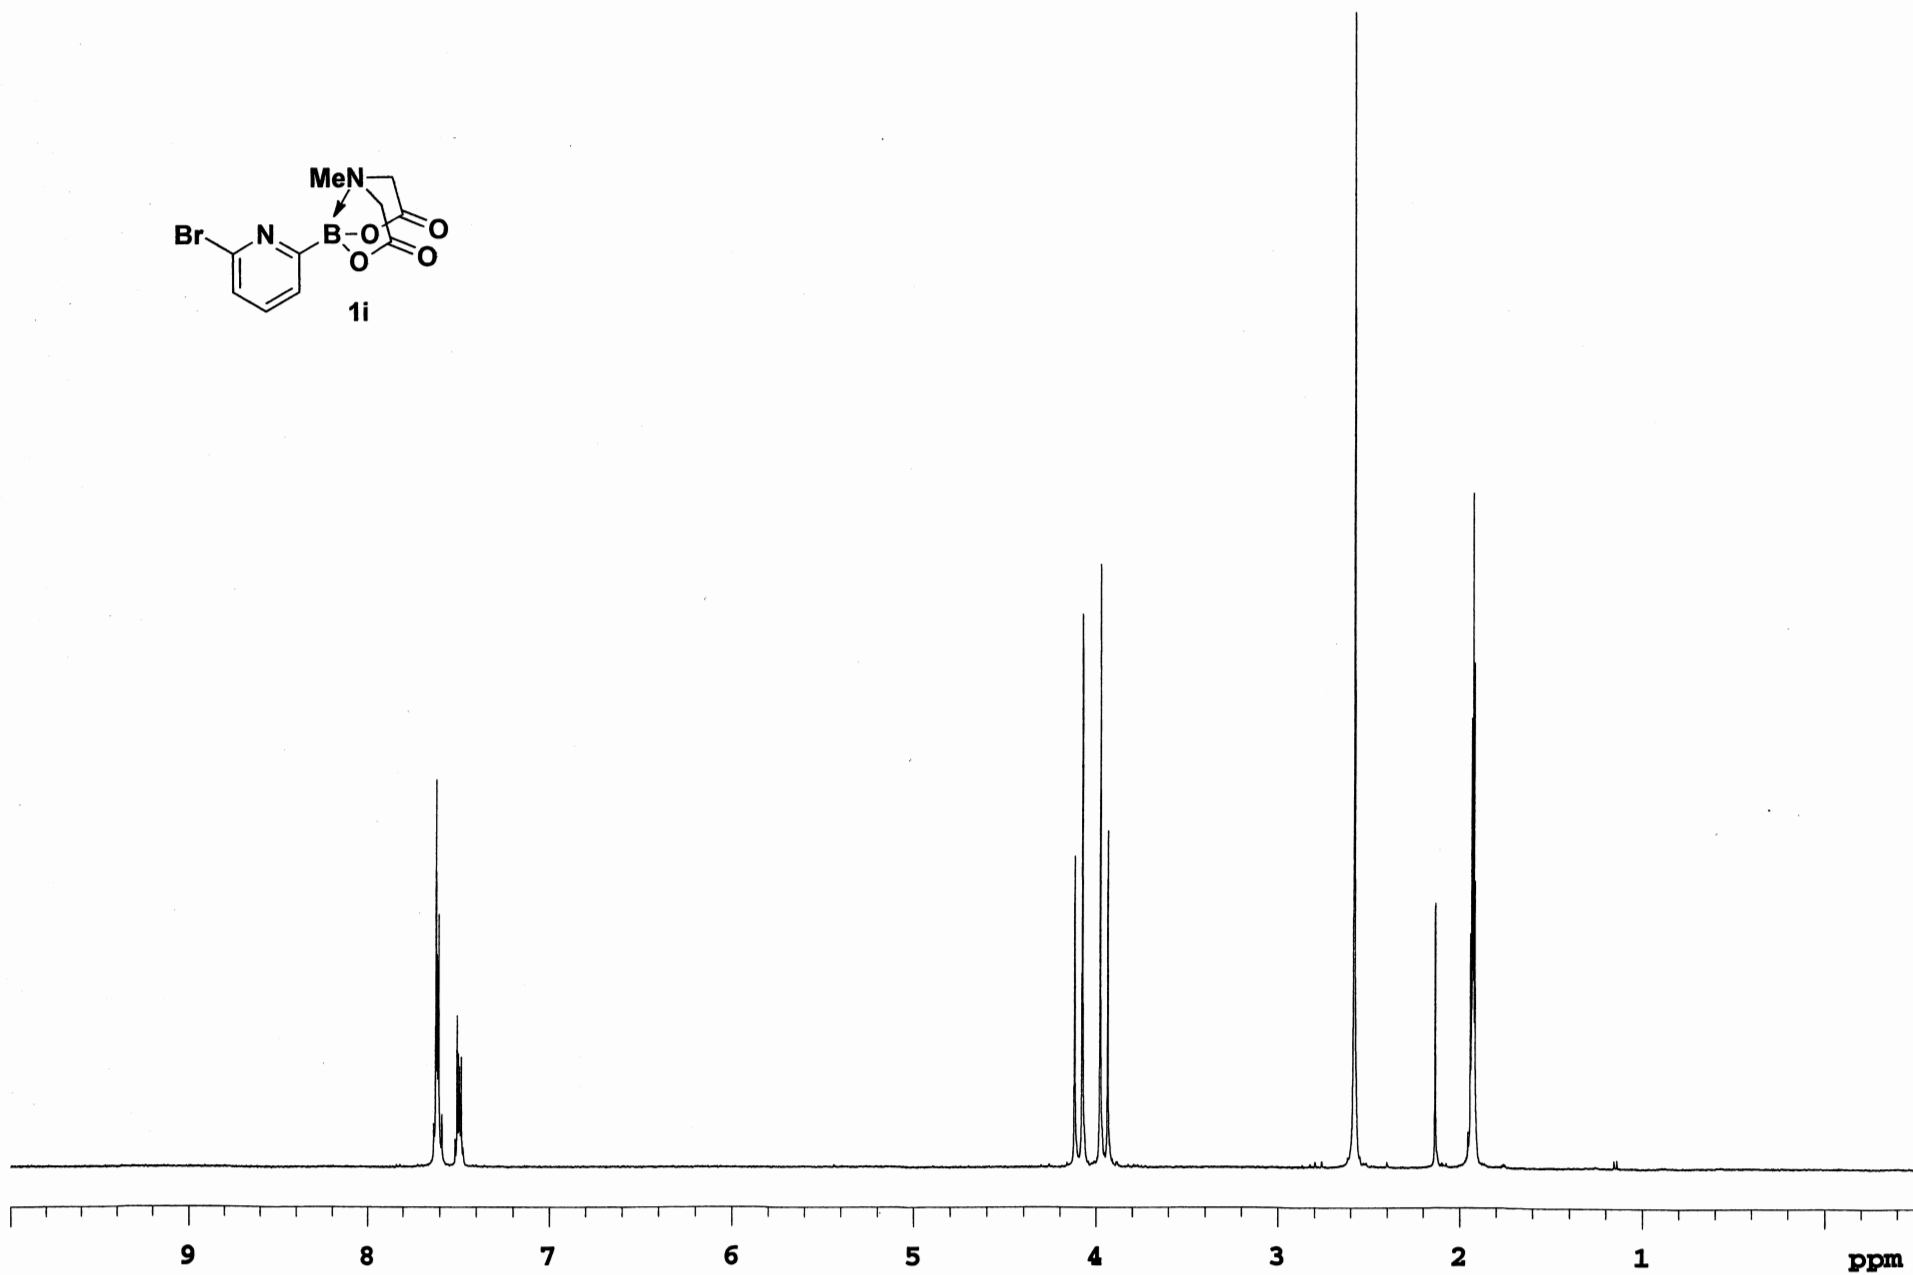

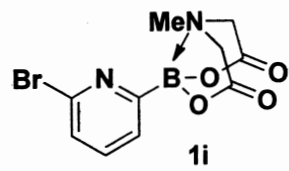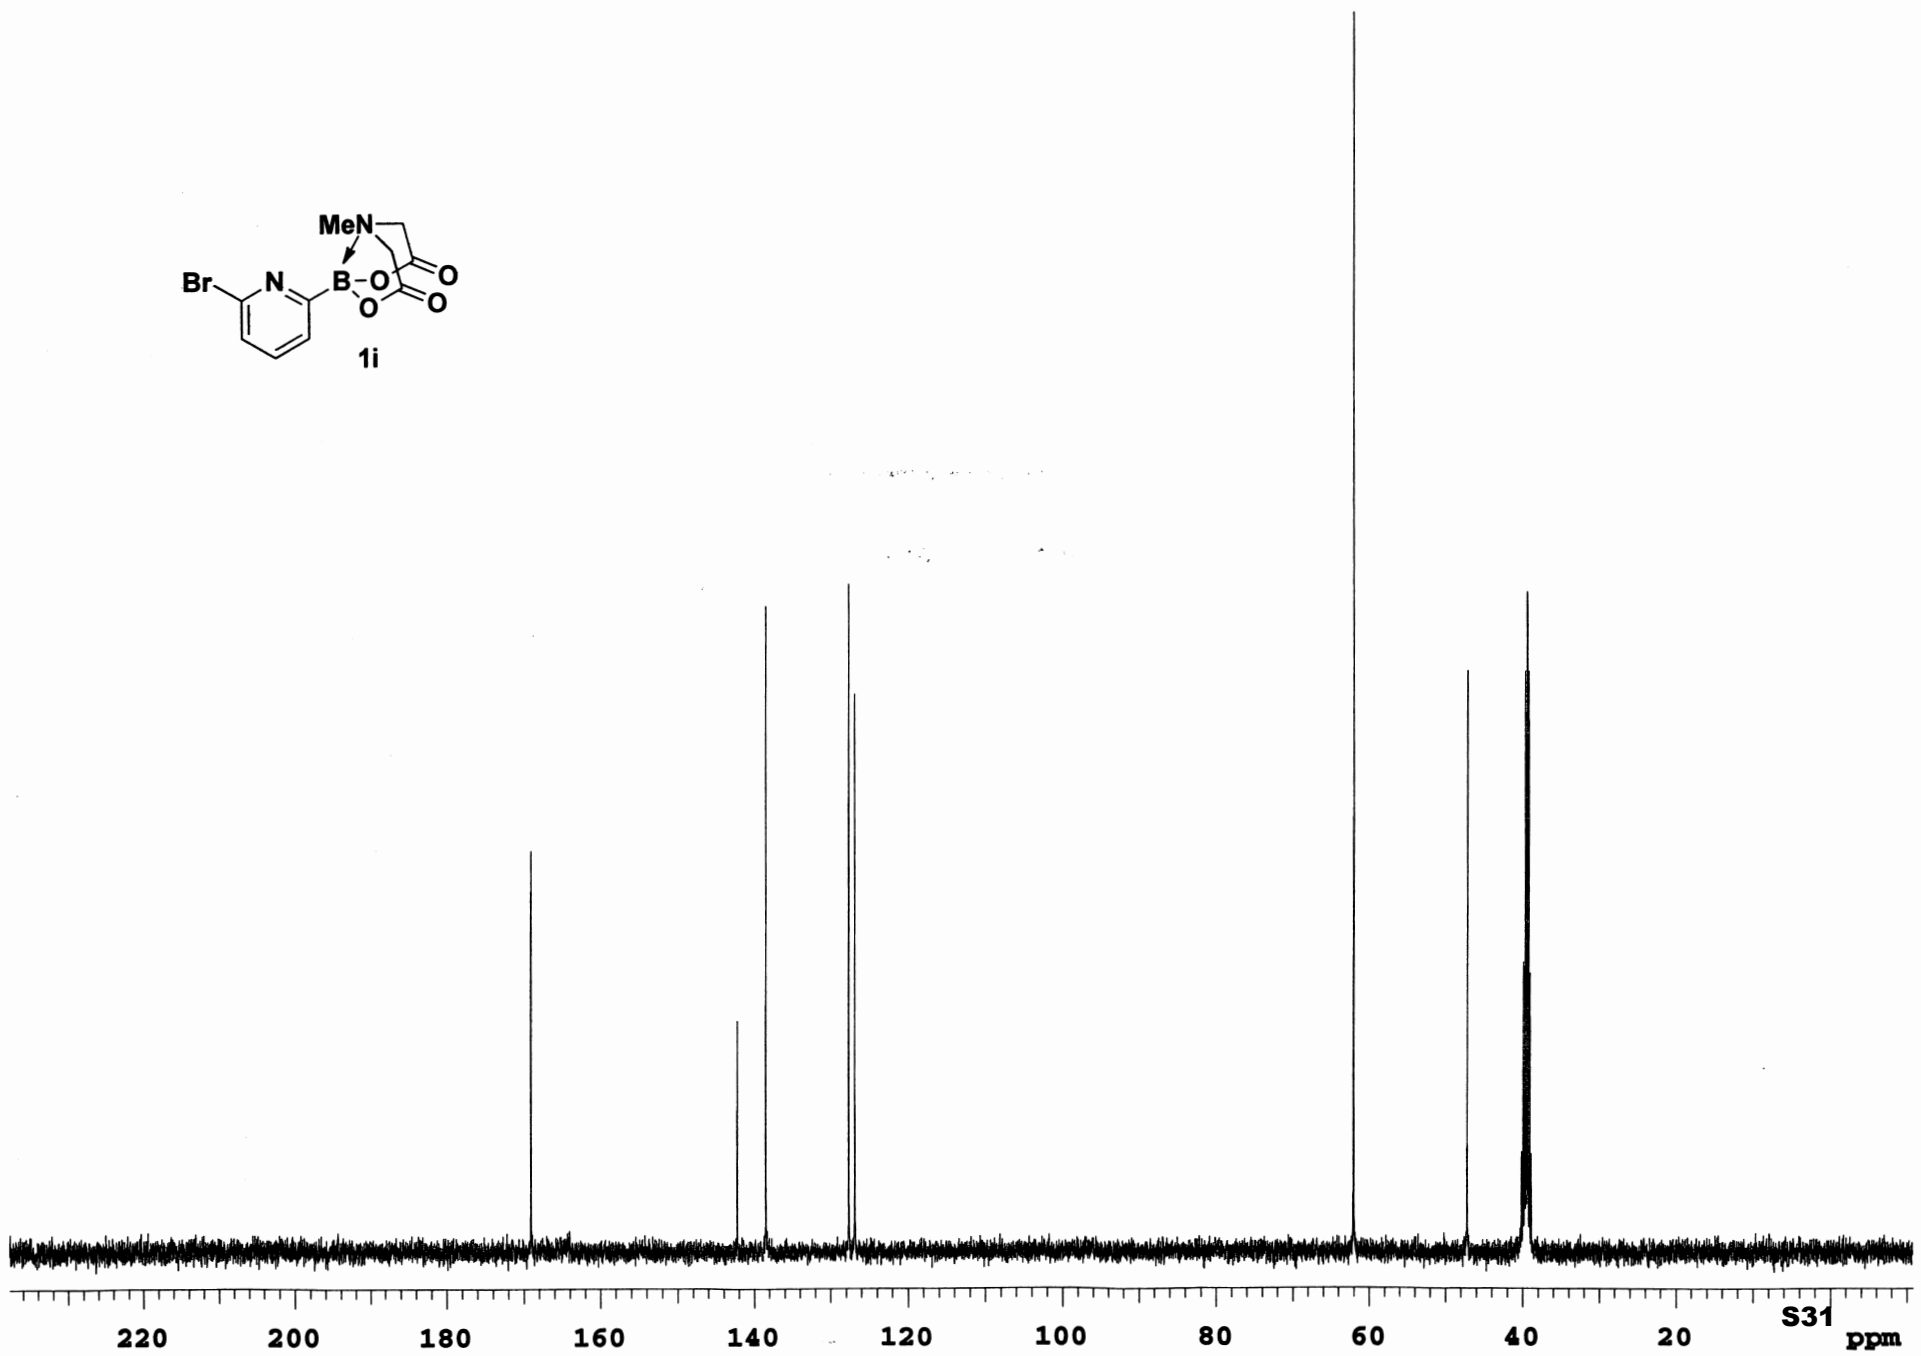

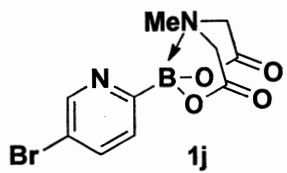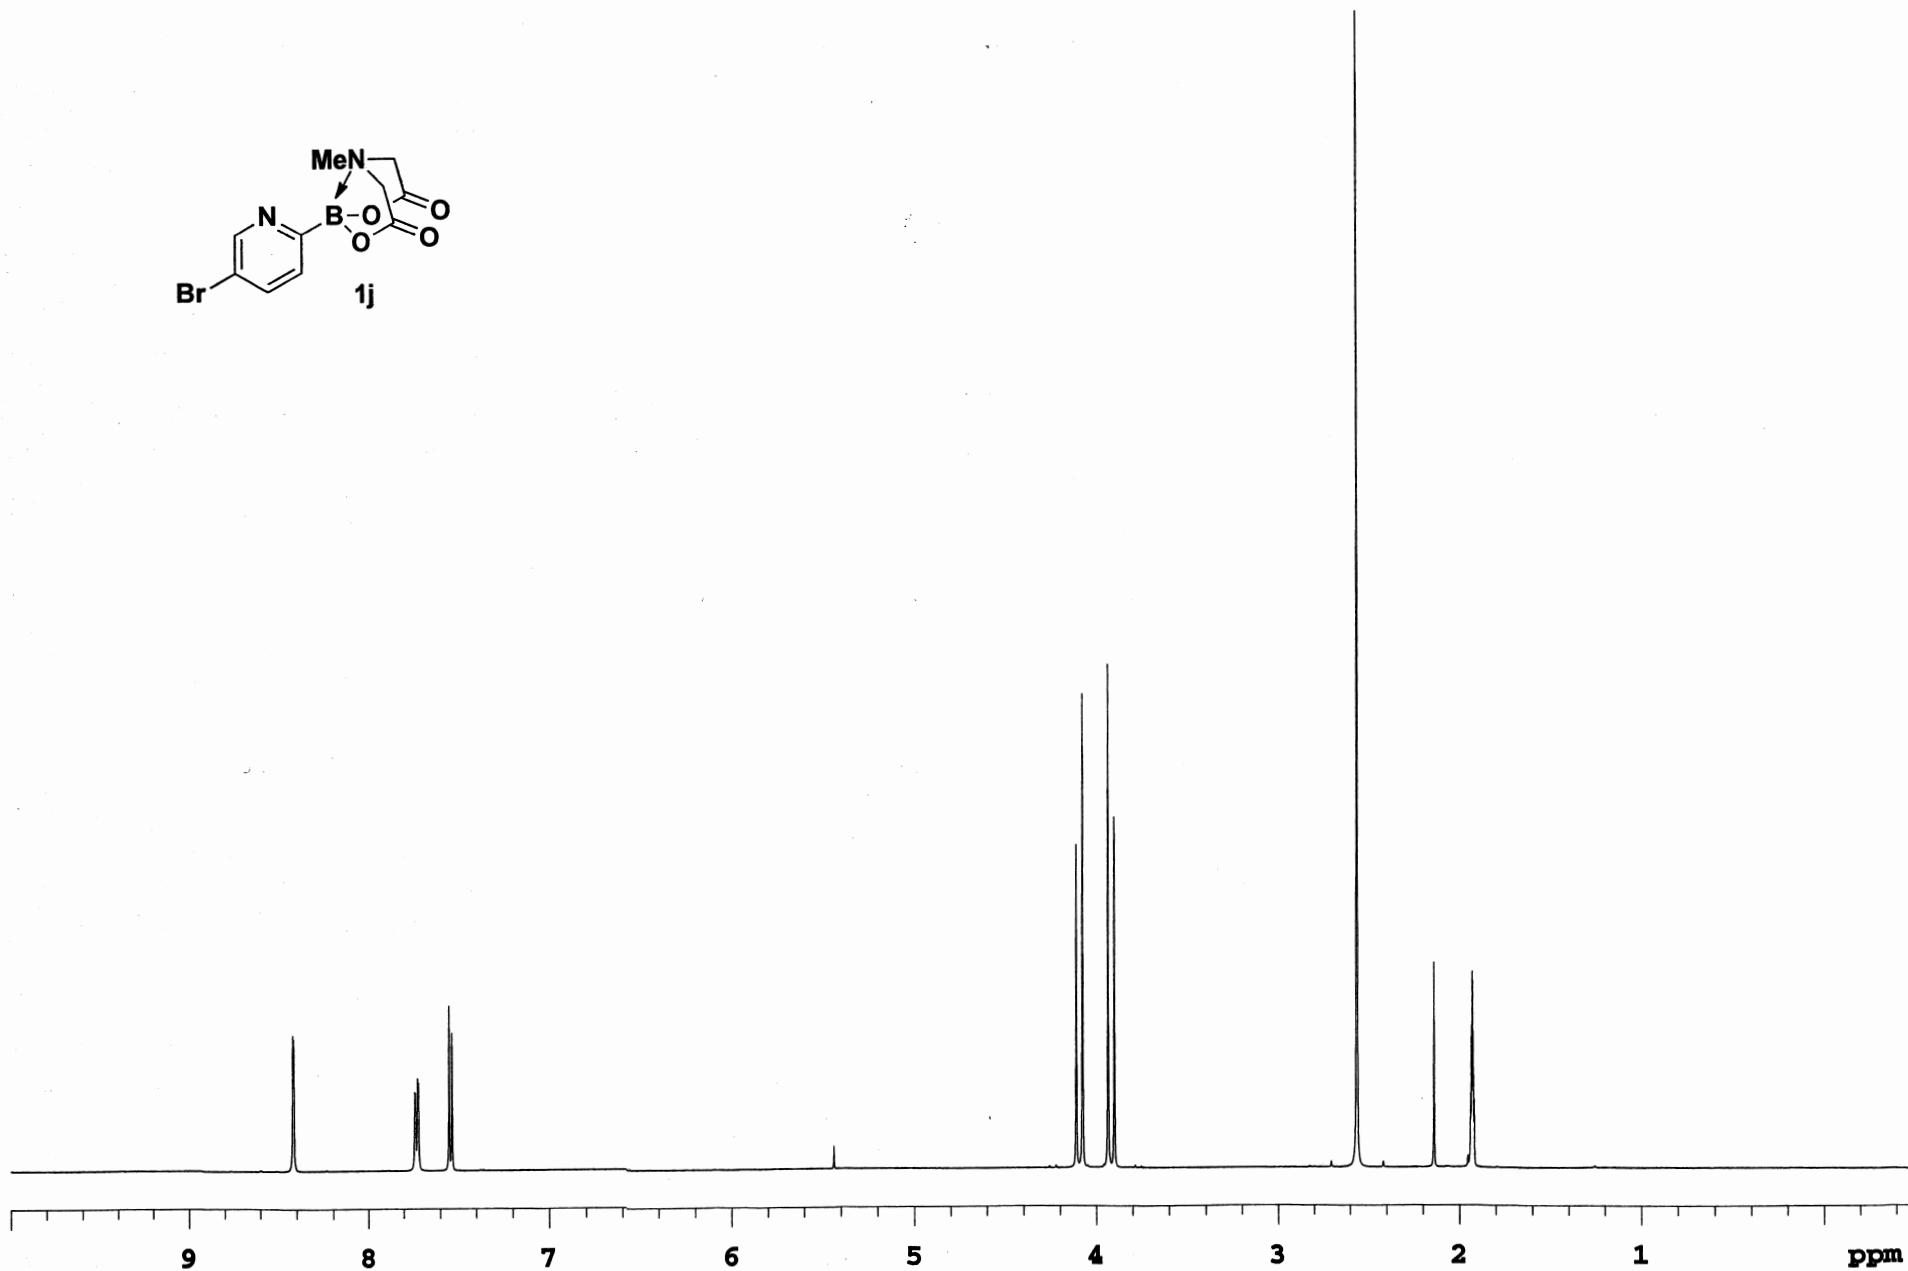

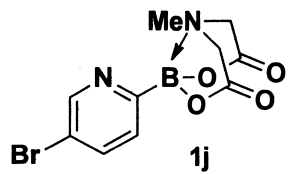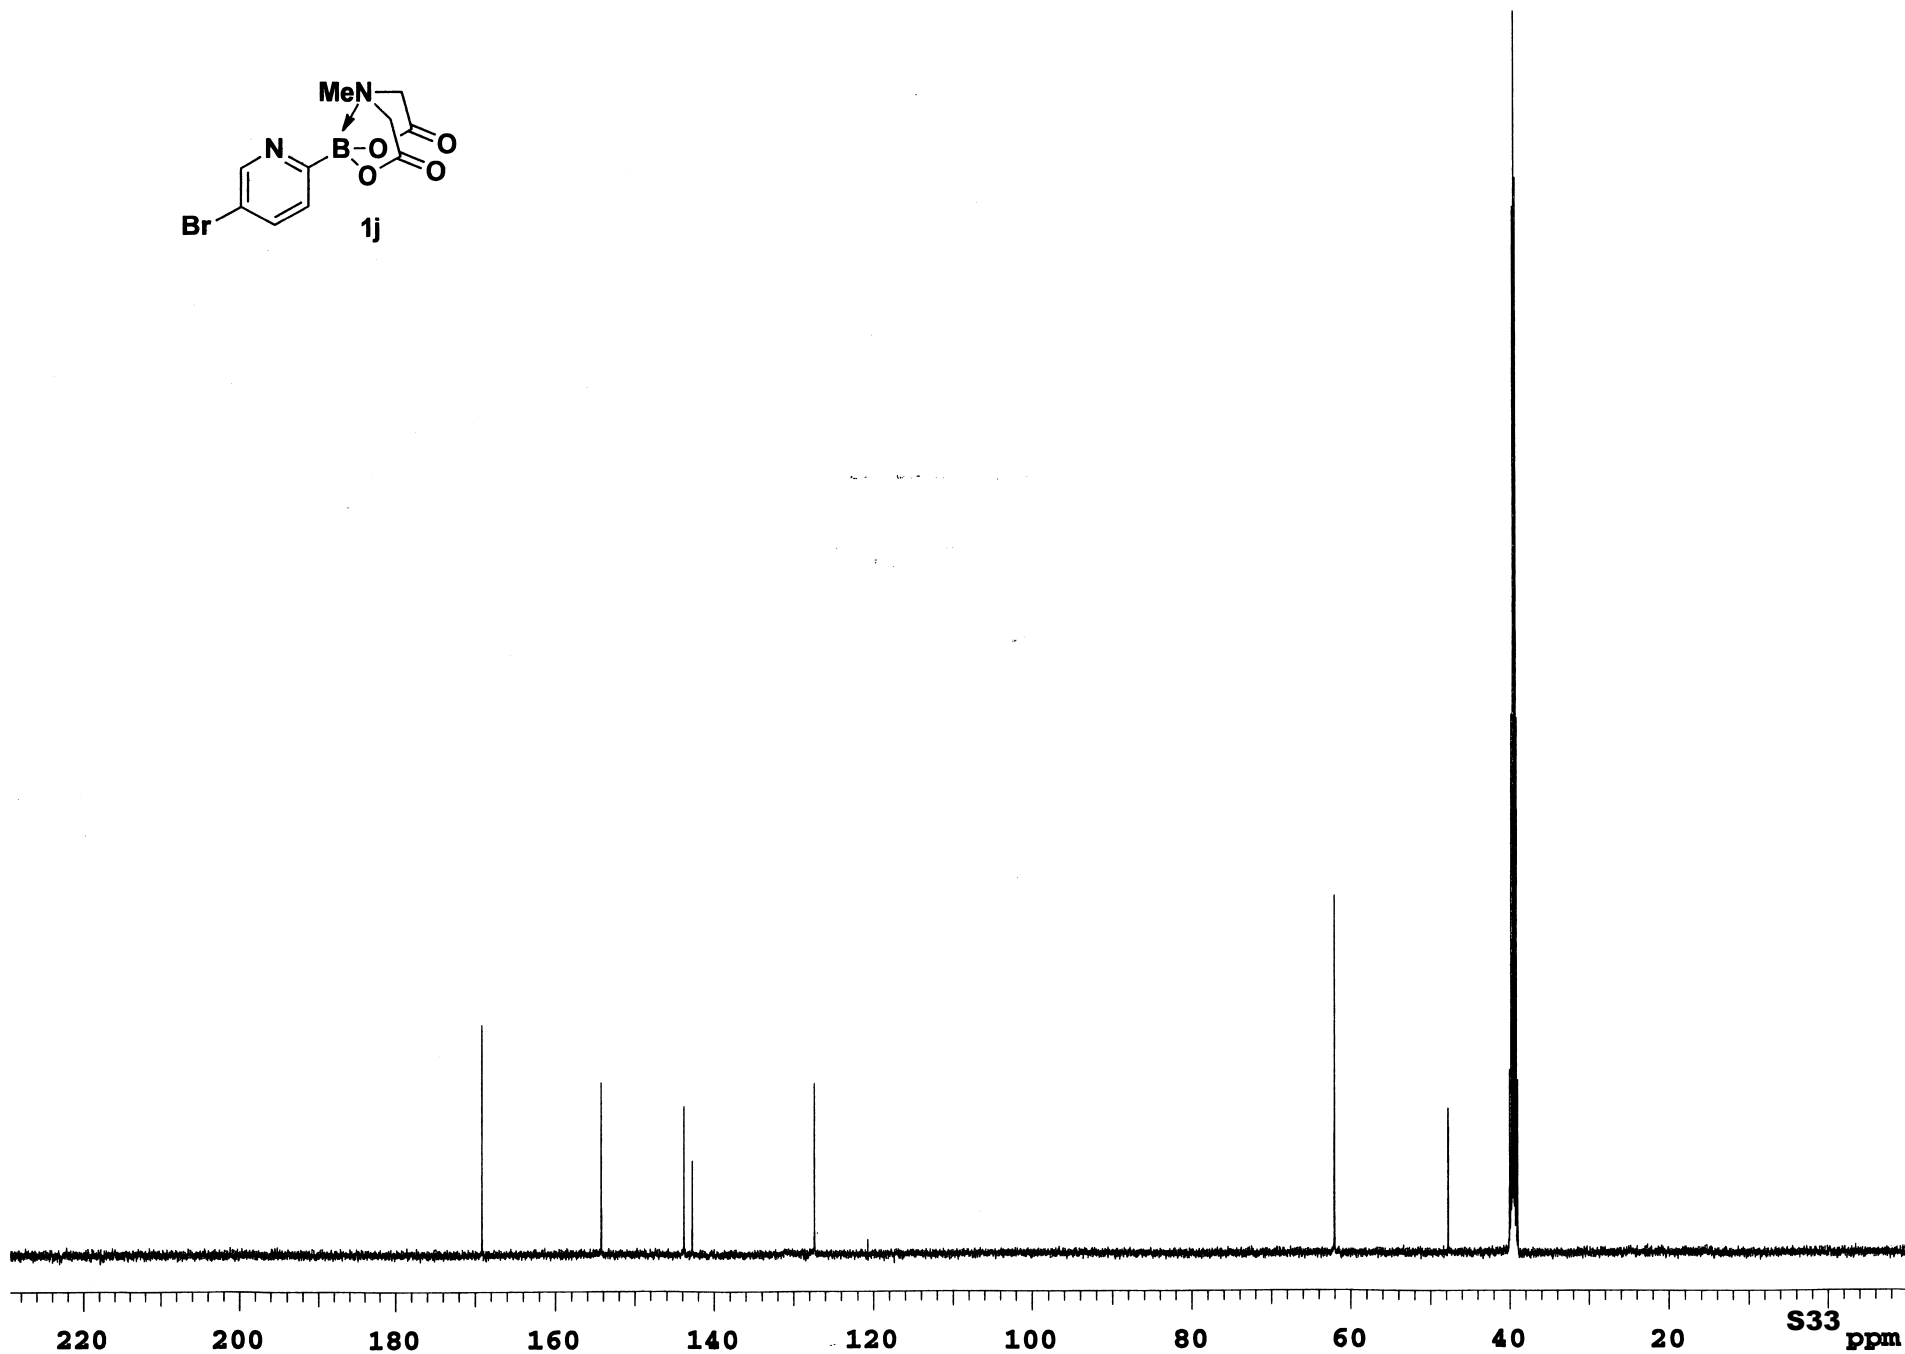

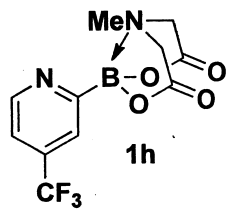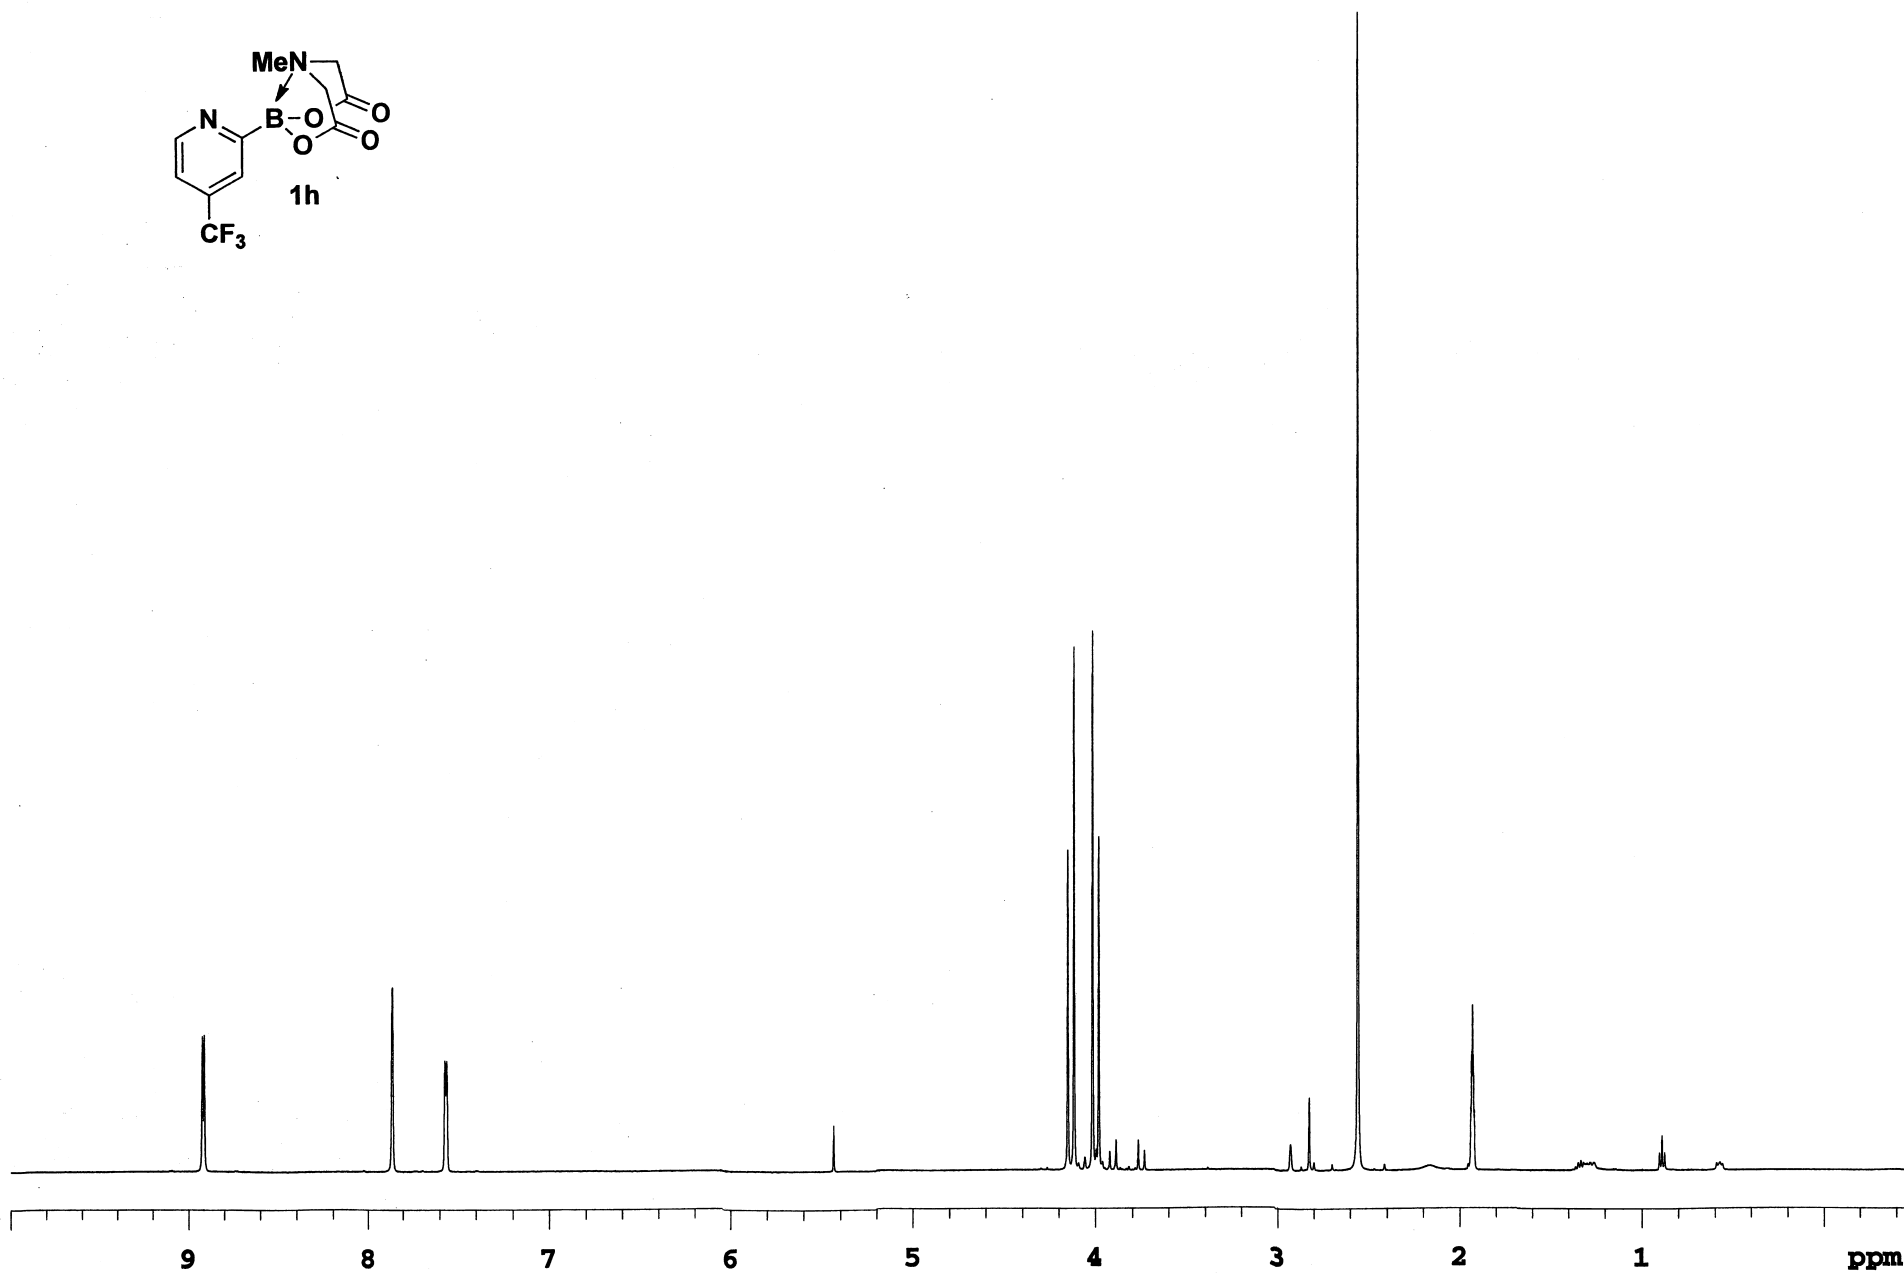

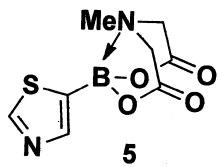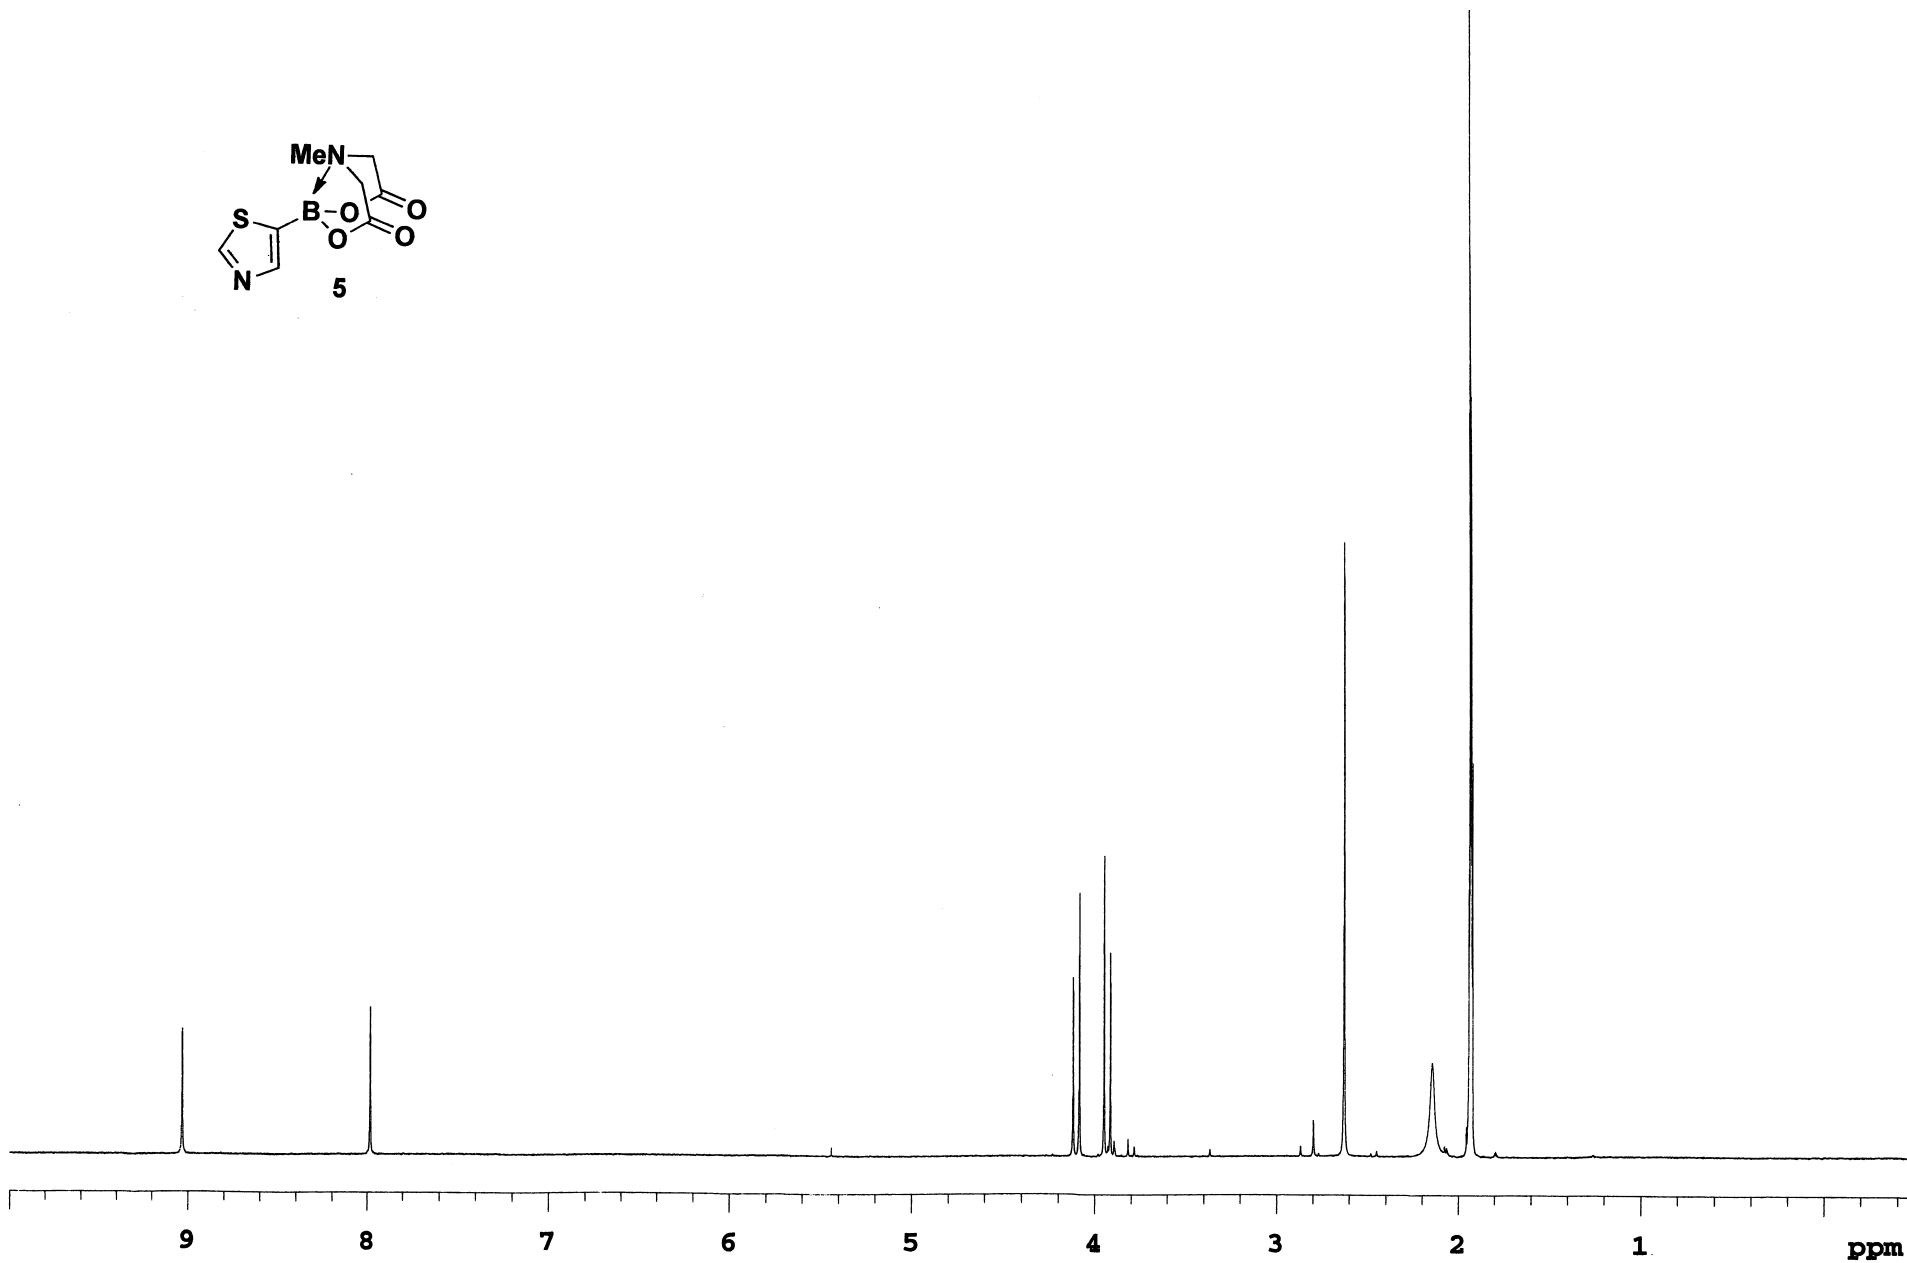

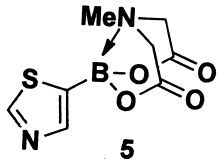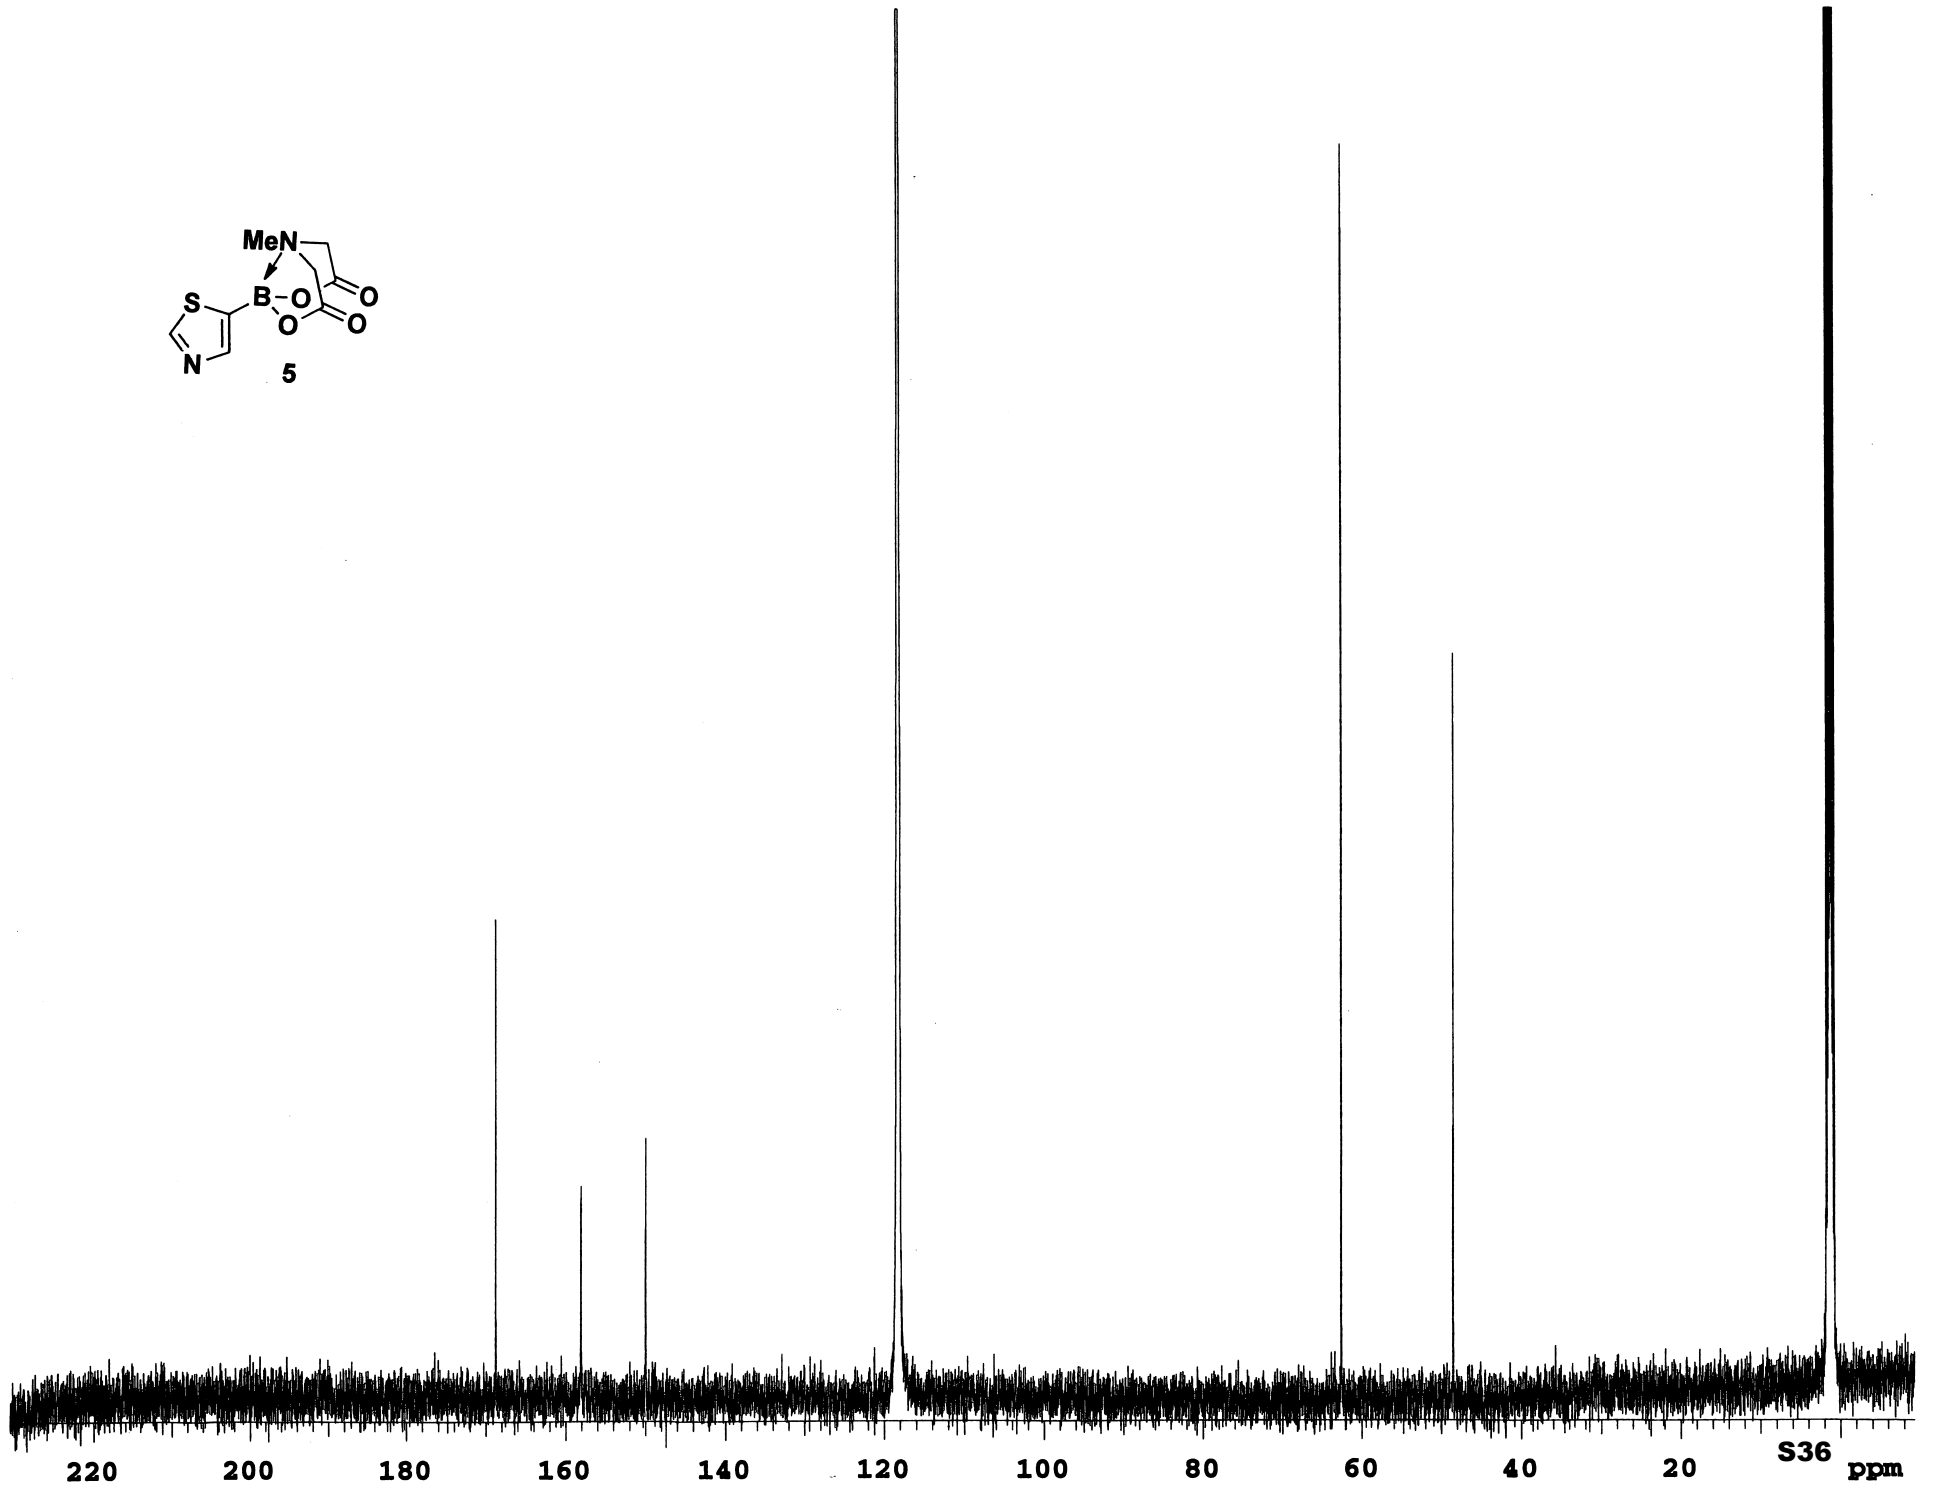



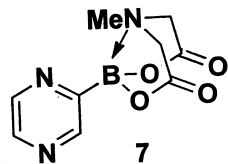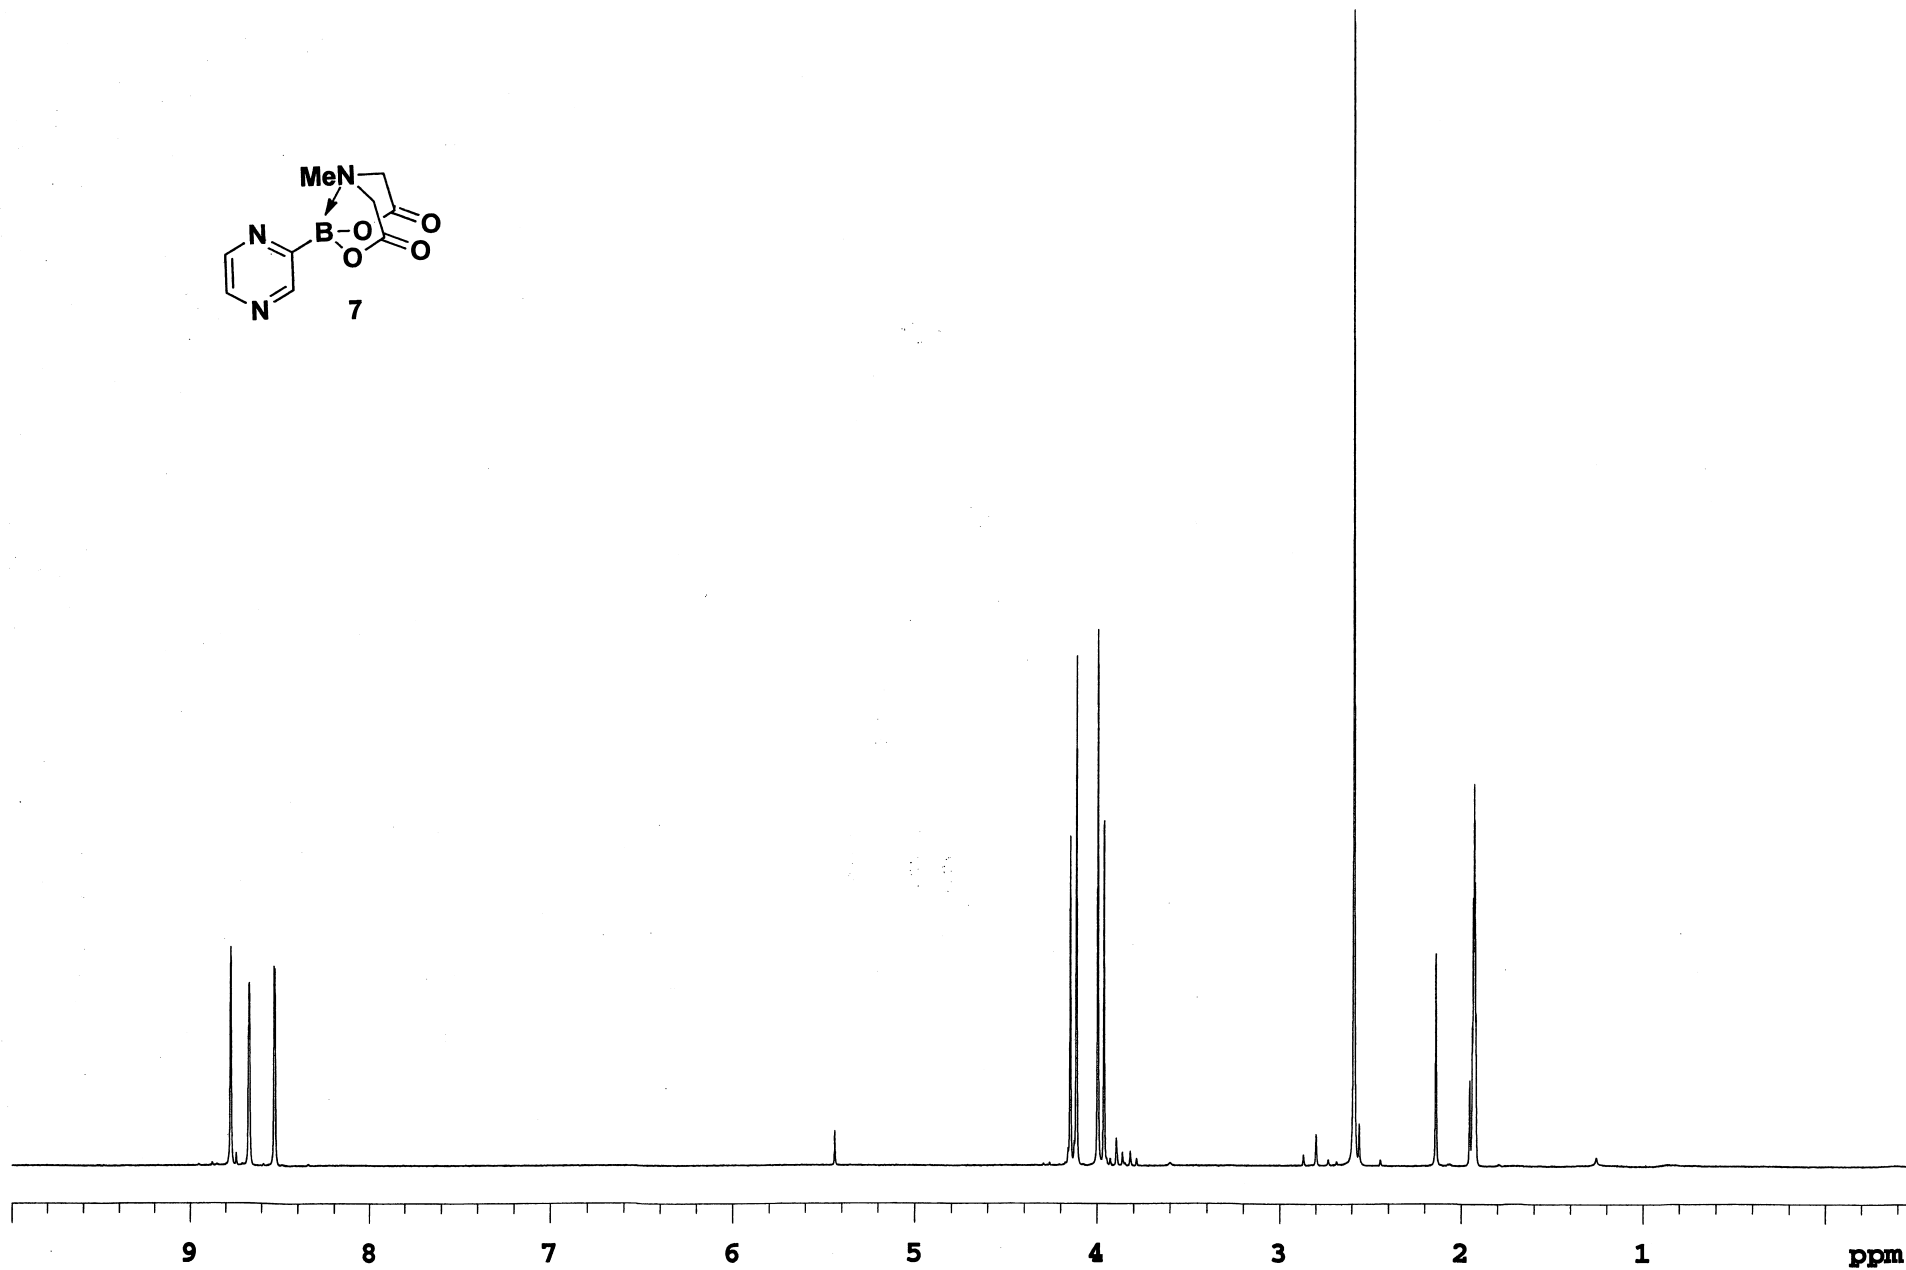

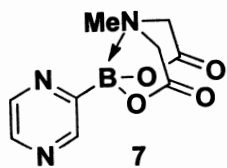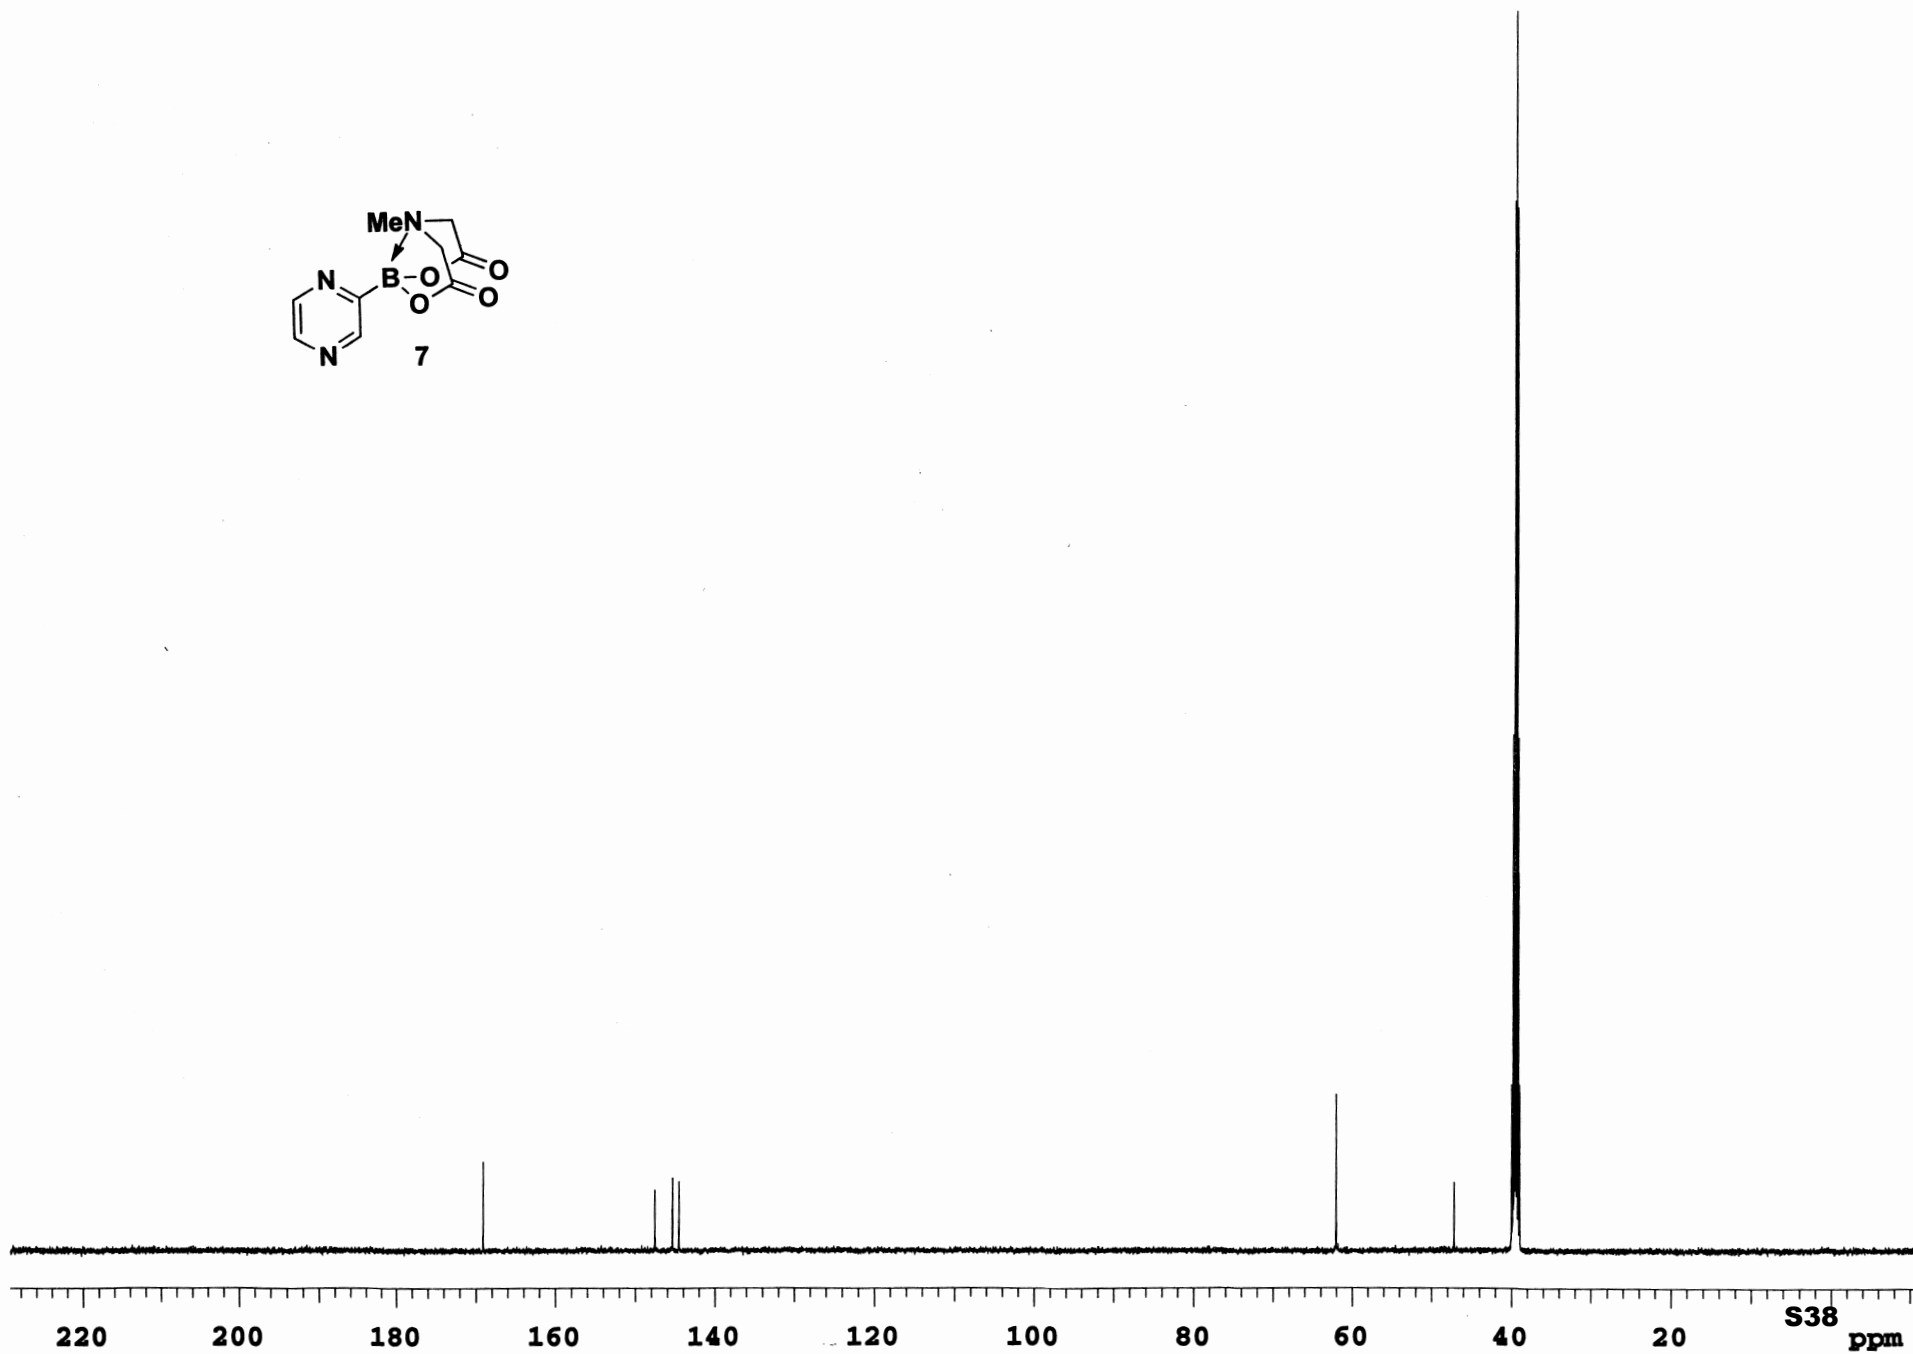

Supplement: NIHMS201034-supplement-2_si_002.pdf [file NIHMS201034-supplement-2_si_002.pdf]
